# Supplementary material
Source: PubMed Central journal article supplement (PMC3775444)

## Supporting Information for:

### Ring-Opening of the $\gamma$ -OH-PdG Adduct Promotes Error-Free Bypass by the *Sulfolobus solfataricus* DNA polymerase Dpo4

Ganesh Shanmugam,<sup>1¶</sup> Irina G. Minko,<sup>3¶</sup> Surajit Banerjee,<sup>1</sup> Plamen P. Christov,<sup>1</sup> Ivan D. Kozekov,<sup>1</sup> Carmelo J. Rizzo,<sup>1,2</sup> R. Stephen Lloyd,<sup>3,4</sup> Martin Egli,<sup>2</sup> and Michael P. Stone<sup>1,2,\*</sup>

From the Departments of <sup>1</sup>Chemistry and <sup>2</sup>Biochemistry, Center in Molecular Toxicology, Vanderbilt-Ingram Cancer Center, Vanderbilt Institute of Chemical Biology, and Center for Structural Biology, Vanderbilt University, Nashville, TN 37235, and <sup>3</sup>Center for Research on Occupational and Environmental Toxicology and <sup>4</sup>Department of Molecular and Medical Genetics, Oregon Health & Science University, Portland, OR 97239

#### Table of Contents

|                                                                                                                                                                 |         |
|-----------------------------------------------------------------------------------------------------------------------------------------------------------------|---------|
| <b>Figure S1.</b> TIC mass spectrum from the extension of the 5'-GXC-3' template (X= $\gamma$ -OH-PdG).....                                                     | S3      |
| <b>Figure S2-S4.</b> Reconstructed LC-ESI/MS ion chromatograms from the extension of the 5'-GXC-3' template (X= $\gamma$ -OH-PdG).....                          | S3-S4   |
| <b>Figure S5.</b> TIC mass spectrum from the extension of the 5'-GXC-3' template (X= $\gamma$ -OH-PdG <sub>red</sub> ).....                                     | S5      |
| <b>Figure S6-S8.</b> Reconstructed LC-ESI/MS ion chromatograms from the extension of the 5'-GXC-3' template (X= $\gamma$ -OH-PdG <sub>red</sub> ). .....        | S5-S6   |
| <b>Figure S9.</b> CID mass spectrum of the $m/z$ 1086.5 [M-2H] <sup>-2</sup> product (5'-pTCCGTGA-3').....                                                      | S7      |
| <b>Figure S10.</b> CID mass spectrum of the $m/z$ 828.8 [M-3H] <sup>-3</sup> product (5'-pTCCGTGAA-3').....                                                     | S7      |
| <b>Figure S11.</b> CID mass spectrum of the $m/z$ 820.6 [M-3H] <sup>-3</sup> product (5'-pTCCGTGAC-3').....                                                     | S8      |
| <b>Figure S12.</b> CID mass spectrum of the $m/z$ 834.2 [M-3H] <sup>-3</sup> product (5'-pTCCGTGAG-3').....                                                     | S8      |
| <b>Figure S13.</b> CID mass spectrum of the $m/z$ 1098.7 [M-2H] <sup>-2</sup> product (5'-pTCAGTGA-3') .....                                                    | S9      |
| <b>Figure S14.</b> CID mass spectrum of the $m/z$ 836.9 [M-3H] <sup>-3</sup> product (5'-pTCAGTGAA-3').....                                                     | S9      |
| <b>Figure S15.</b> CID mass spectrum of the $m/z$ 1106.5 [M-2H] <sup>-2</sup> product (5'-pTCGGTGA-3') .....                                                    | S10     |
| <b>Figure S16.</b> CID mass spectrum of the $m/z$ 842.2 [M-3H] <sup>-3</sup> product (5'-pTCGGTGAA-3') .....                                                    | S10     |
| <b>Figure S17.</b> CID mass spectrum of the $m/z$ 1094.2 [M-2H] <sup>-2</sup> product (5'-pTCTGTGA-3').....                                                     | S11     |
| <b>Figure S18.</b> CID mass spectrum of the $m/z$ 942.2 [M-3H] <sup>-3</sup> product (5'-pTC-GTGA-3').....                                                      | S11     |
| <b>Figure S19.</b> CID mass spectrum of the $m/z$ 922.2 [M-2H] <sup>-2</sup> product (5'-pTCC-TGA-3') .....                                                     | S12     |
| <b>Figure S20.</b> TIC mass spectrum from the extension of the 5'-GXT-3' template (X= $\gamma$ -OH-PdG).....                                                    | S12     |
| <b>Figure S21-22.</b> Reconstructed LC-ESI/MS ion chromatograms from the extension of the 5'-GXT-3' template (X= $\gamma$ -OH-PdG). .....                       | S13     |
| <b>Figure S23.</b> TIC mass spectrum from the extension of the 5'-GXT-3' template (X= $\gamma$ -OH-PdG <sub>red</sub> ).....                                    | S14     |
| <b>Figure S24-25.</b> Reconstructed LC-ESI/MS ion chromatograms from the extension of the 5'-GXT-3' template (X= $\gamma$ -OH-PdG <sub>red</sub> ) (con't)..... | S14-S15 |
| <b>Figure S26.</b> CID mass spectrum of the $m/z$ 1078.7 [M-2H] <sup>-2</sup> product (5'-pTCCATGA-3') .....                                                    | S15     |

|                                                                                                                 |     |
|-----------------------------------------------------------------------------------------------------------------|-----|
| <b>Figure S27.</b> CID mass spectrum of the $m/z$ 823.5 $[M-3H]^{-3}$ product (5'-pTCC <u>C</u> ATGAA-3').....  | S16 |
| <b>Figure S28.</b> CID mass spectrum of the $m/z$ 1223.8 $[M-2H]^{-2}$ product (5'-pTCC <u>C</u> ATGAC-3')..... | S16 |
| <b>Figure S29.</b> CID mass spectrum of the $m/z$ 828.6 $[M-2H]^{-2}$ product (5'-pTCC <u>C</u> ATGAG-3').....  | S17 |
| <b>Figure S30.</b> CID mass spectrum of the $m/z$ 922.2 $[M-2H]^{-2}$ product (5'-pTCC <u>C</u> ATG-3') .....   | S17 |
| <b>Figure S31.</b> CID mass spectrum of the $m/z$ 1090.7 $[M-2H]^{-2}$ product (5'-pTC <u>A</u> ATGA-3') .....  | S18 |
| <b>Figure S32.</b> CID mass spectrum of the $m/z$ 1098.7 $[M-2H]^{-2}$ product (5'-pTC <u>G</u> ATGA-3') .....  | S18 |
| <b>Figure S33.</b> CID mass spectrum of the $m/z$ 836.8 $[M-3H]^{-3}$ product (5'-pTC <u>G</u> ATGAA-3') .....  | S19 |
| <b>Figure S34.</b> CID mass spectrum of the $m/z$ 1086.2 $[M-2H]^{-2}$ product (5'-pTCT <u>T</u> ATGA-3').....  | S19 |

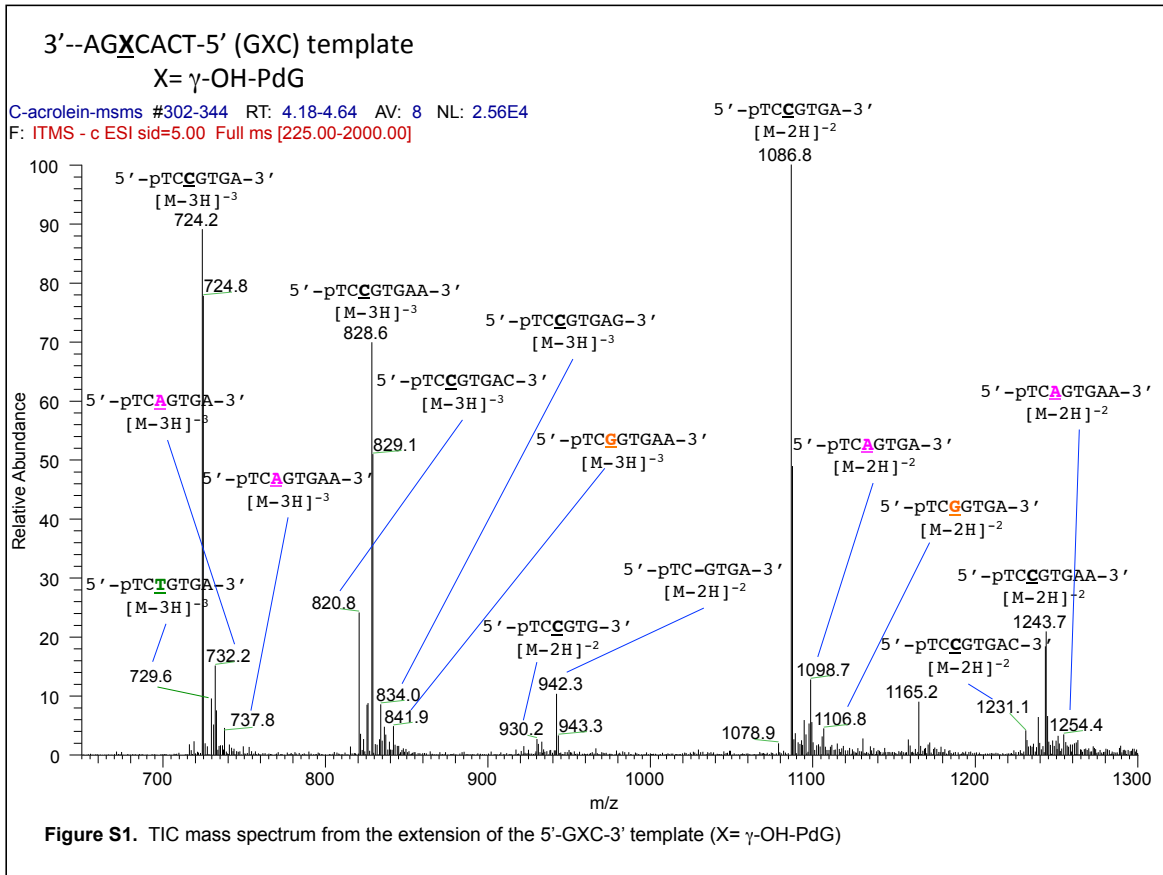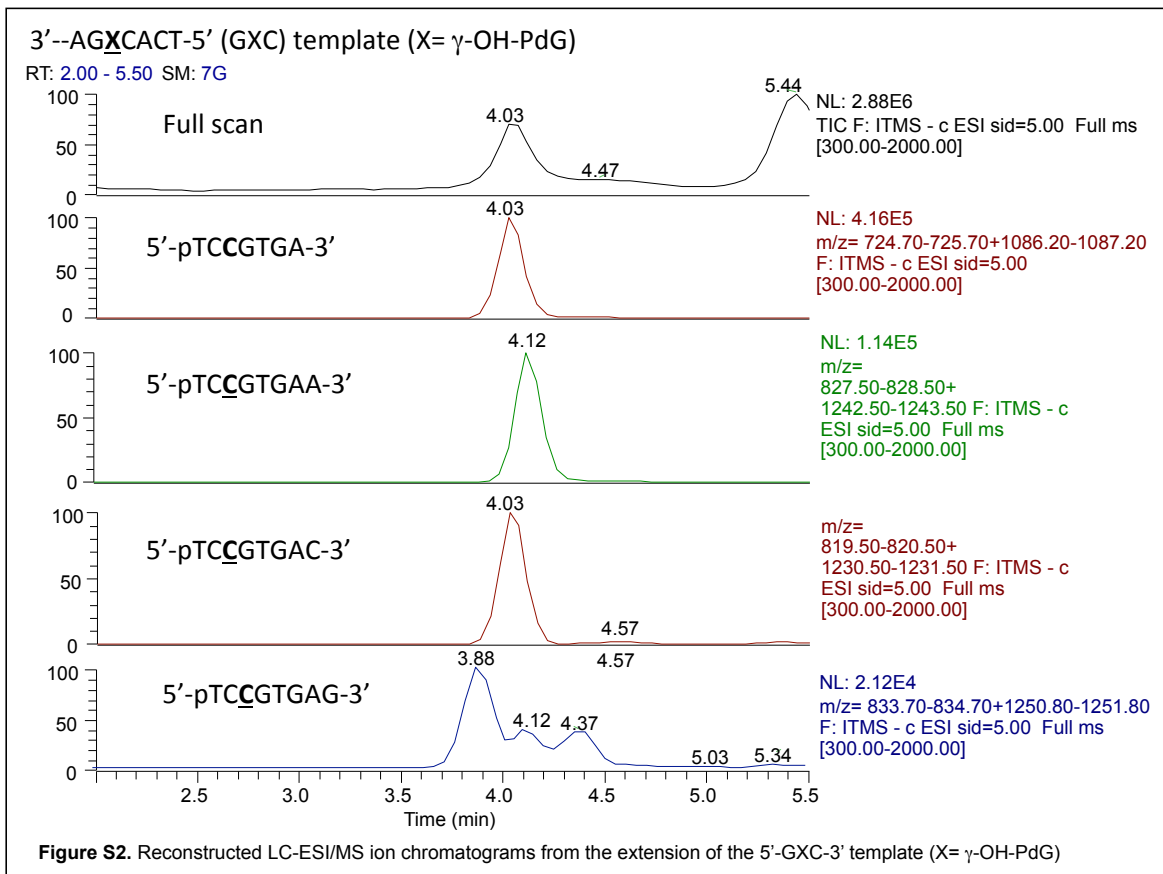

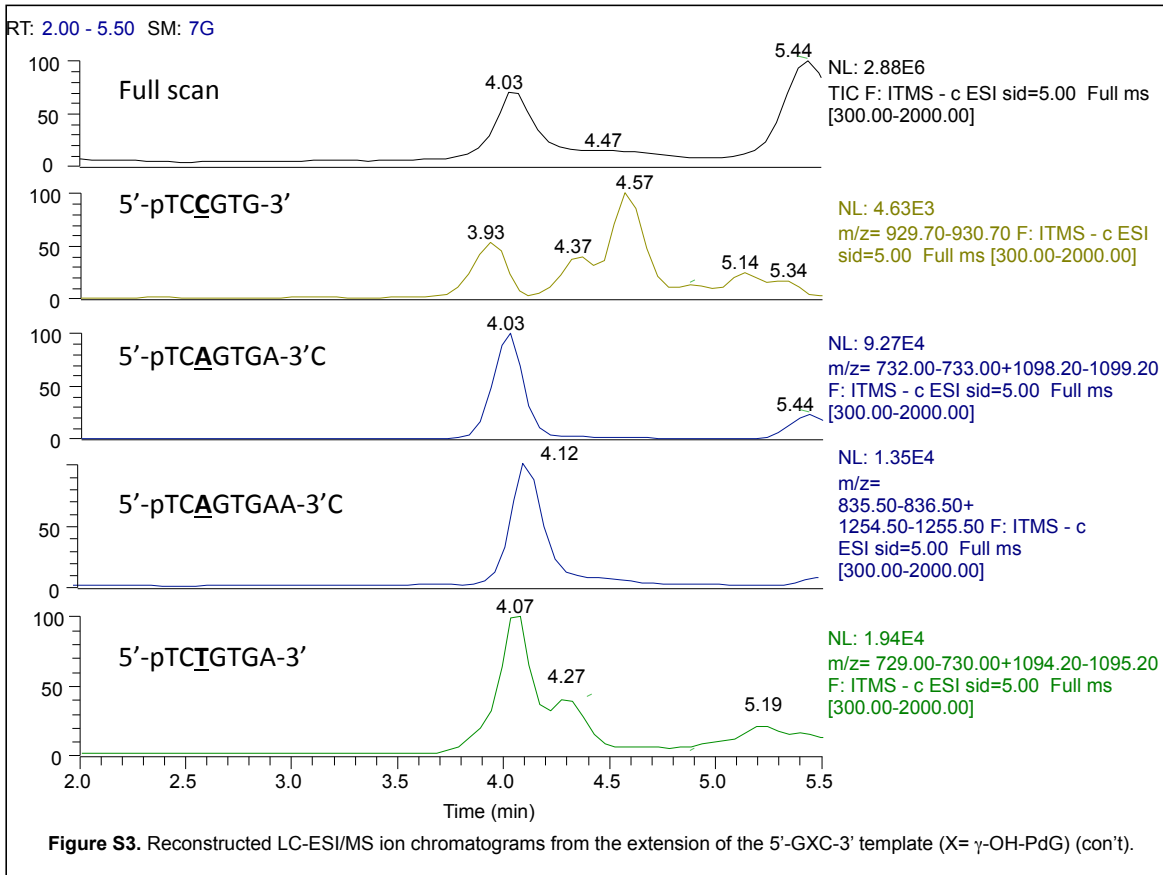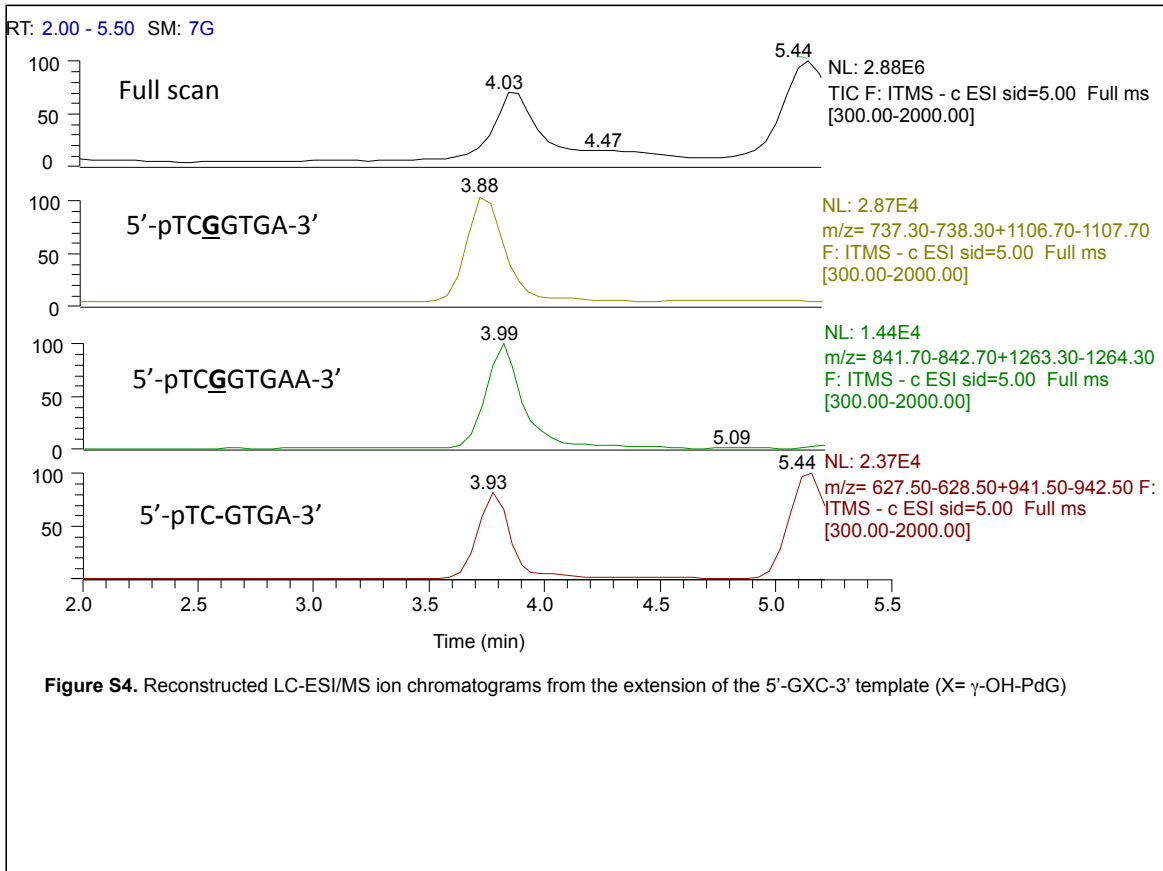

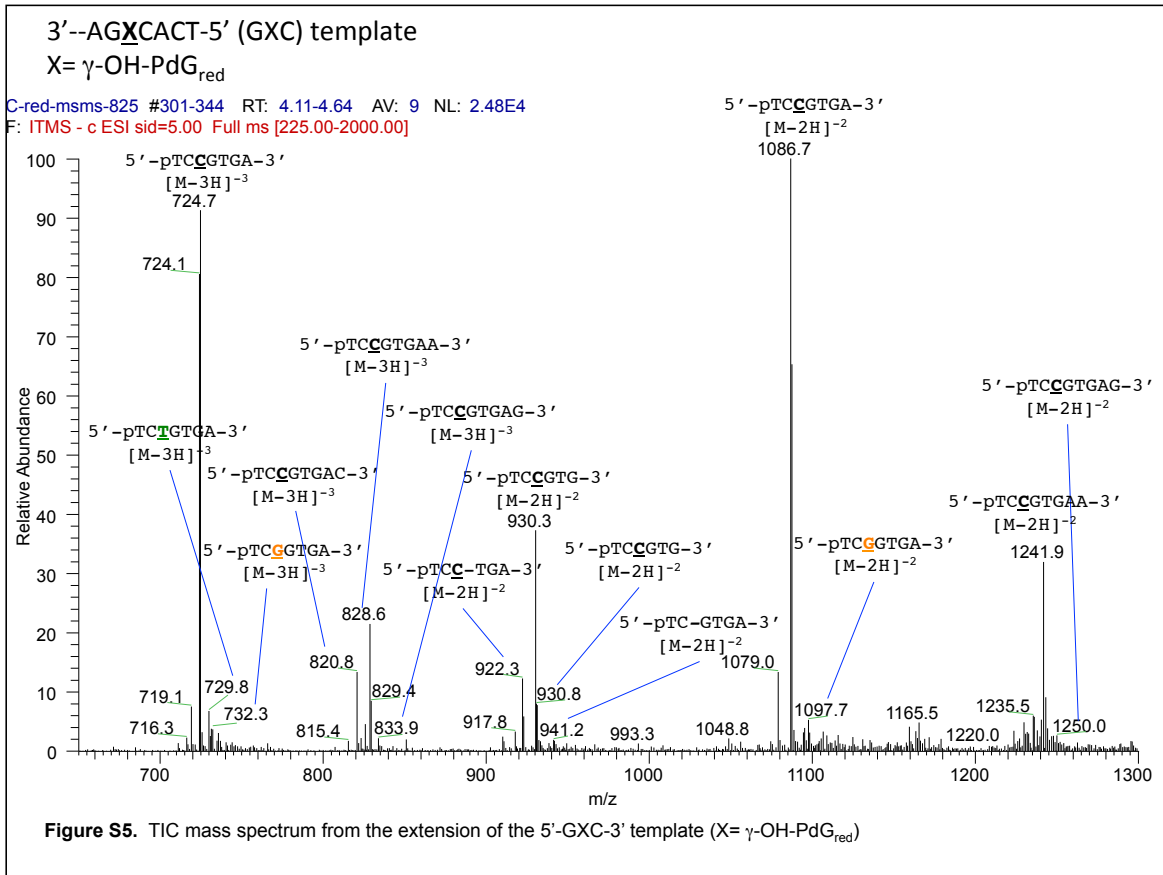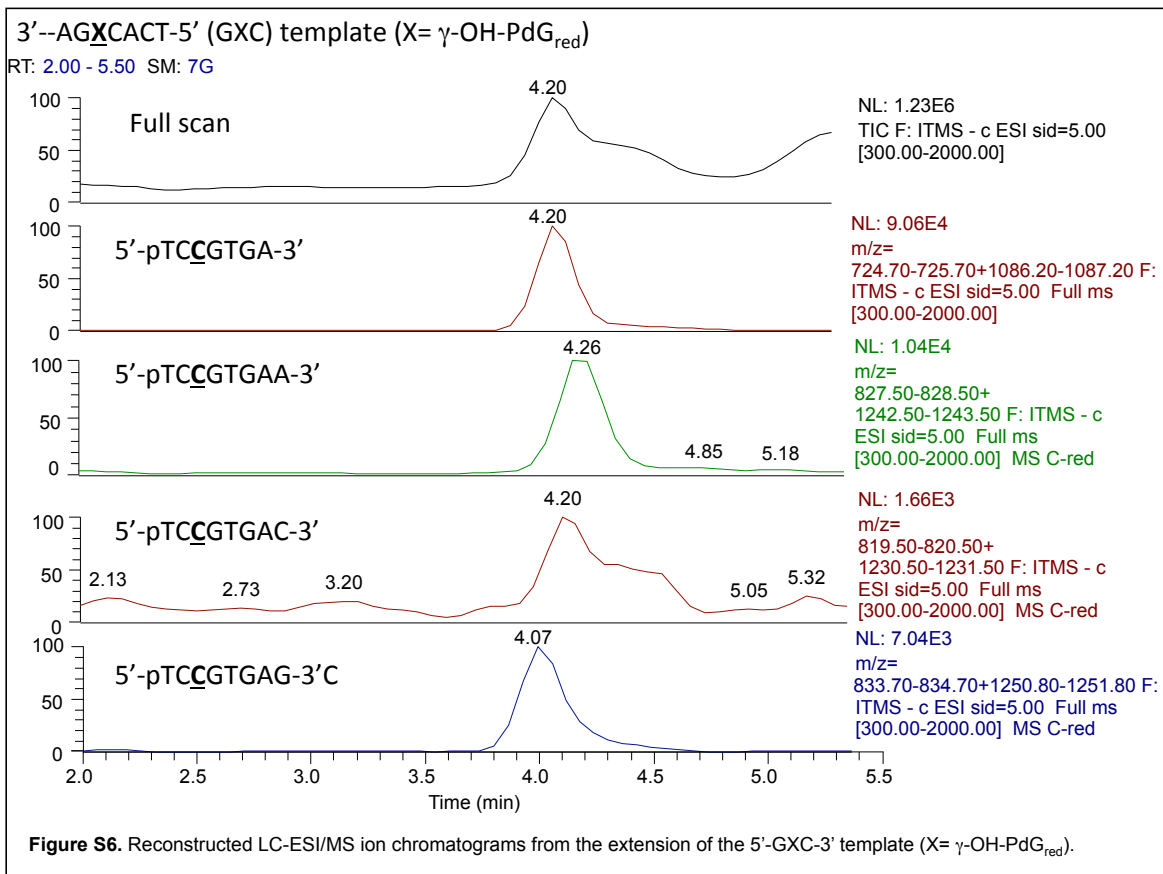

3'--AGXCACT-5' (GXC) template (X=  $\gamma$ -OH-PdG<sub>red</sub>)

RT: 2.00 - 5.50 SM: 7G

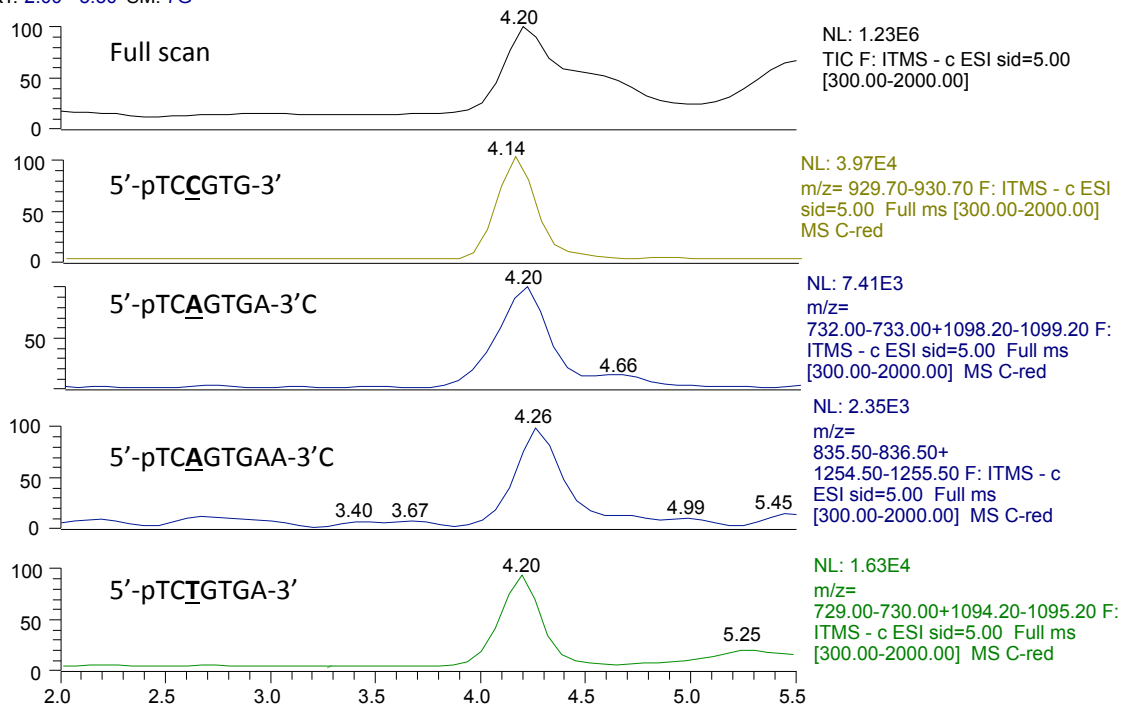

Figure S7. Reconstructed LC-ESI/MS ion chromatograms from the extension of the 5'-GXC-3' template (X=  $\gamma$ -OH-PdG<sub>red</sub>) (con't)

3'--AGXCACT-5' (GXC) template (X=  $\gamma$ -OH-PdG<sub>red</sub>)

RT: 2.00 - 5.50 SM: 7G

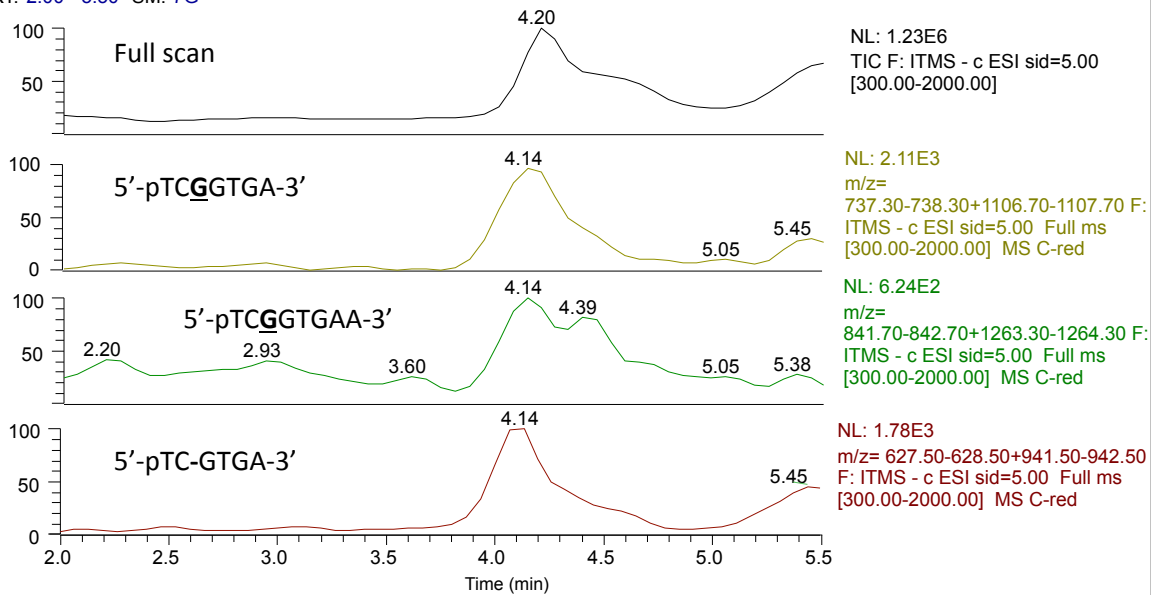

Figure S8. Reconstructed LC-ESI/MS ion chromatograms from the extension of the 5'-GXC-3' template (X=  $\gamma$ -OH-PdG<sub>red</sub>) (con't)

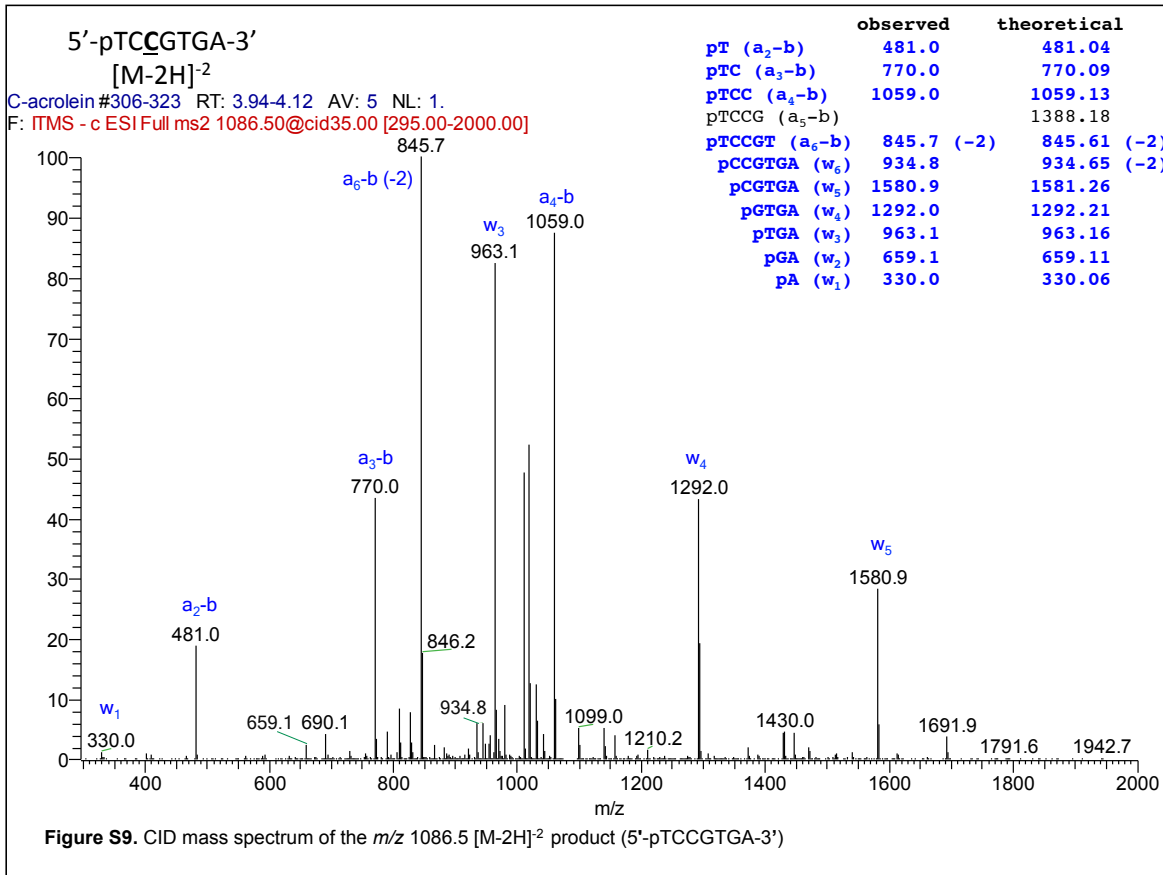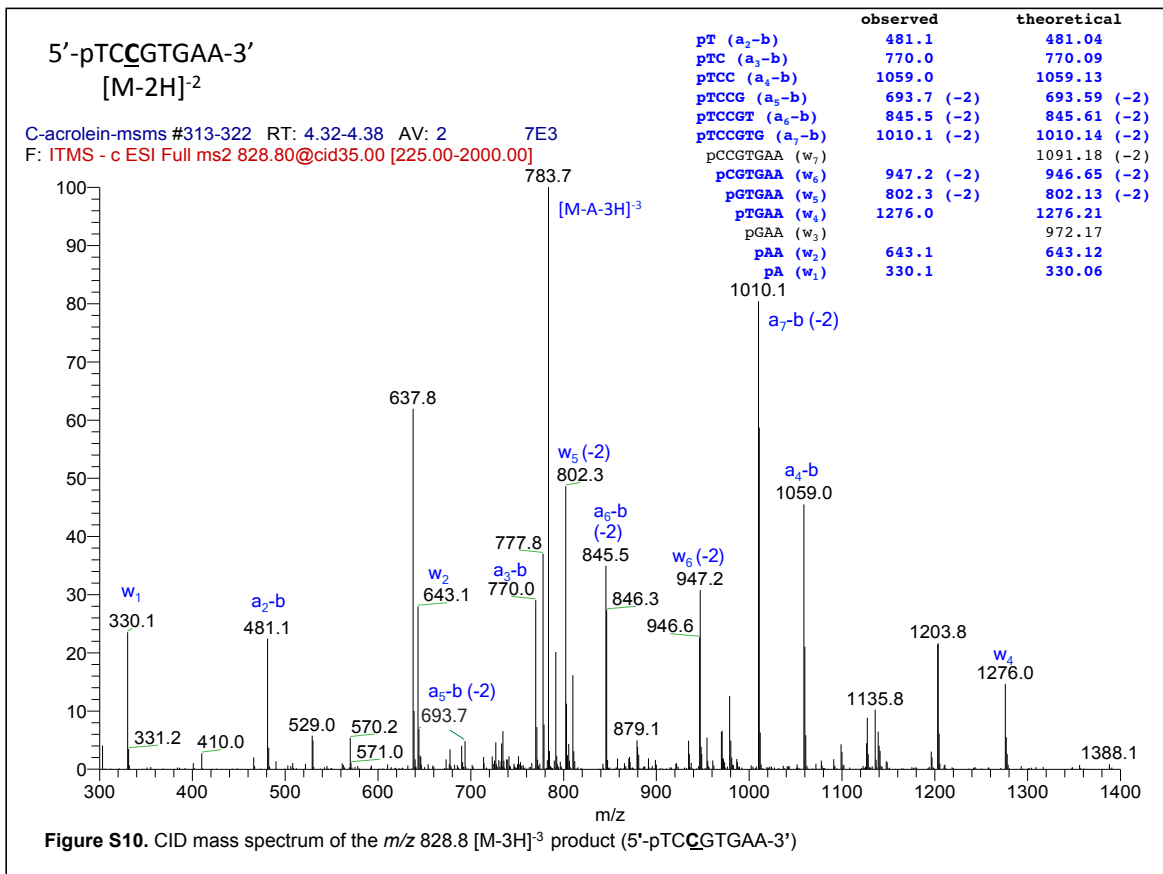

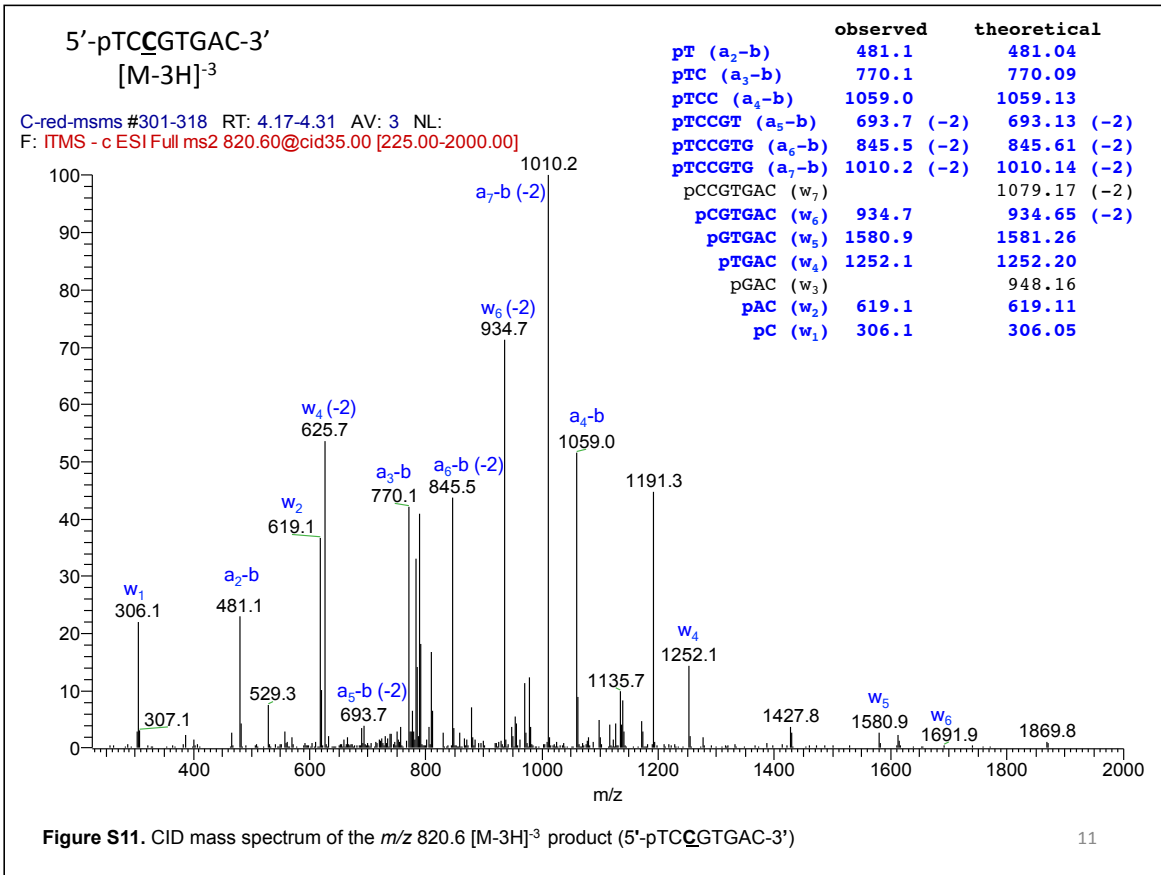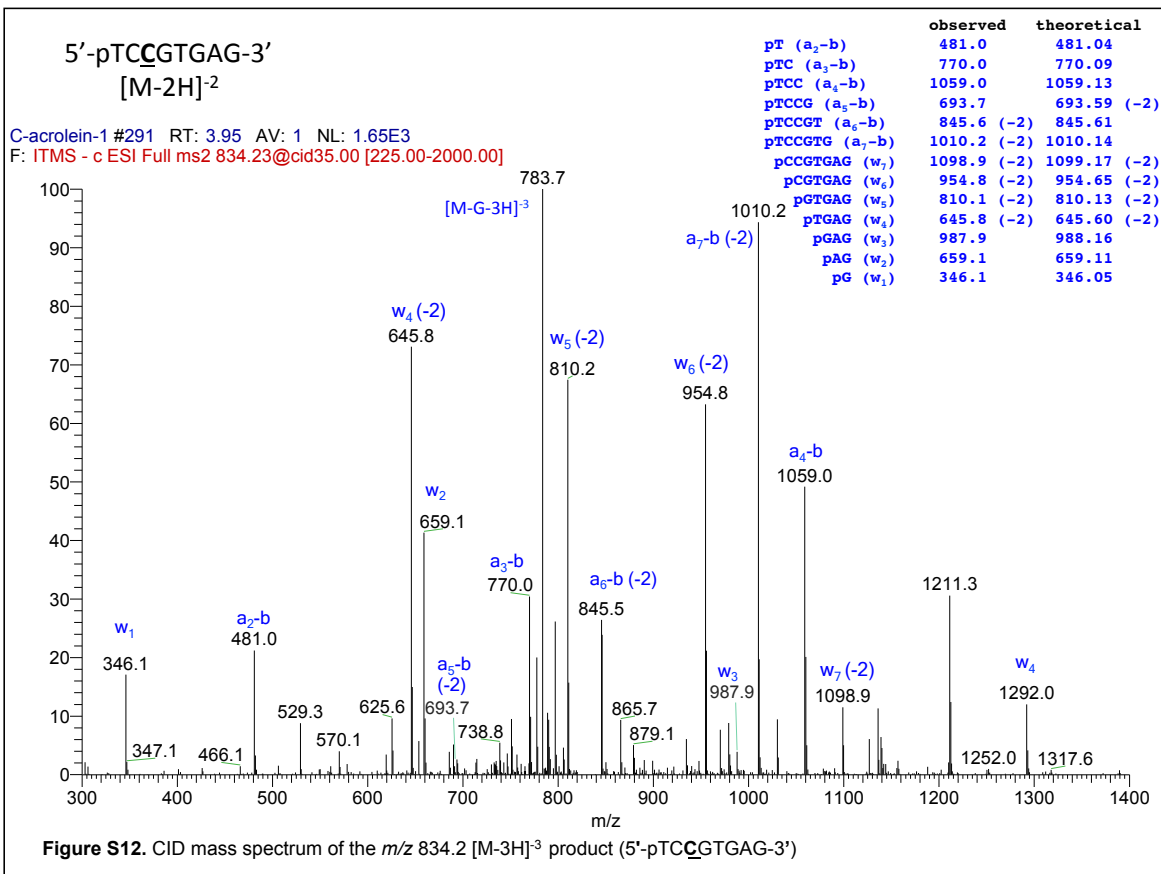



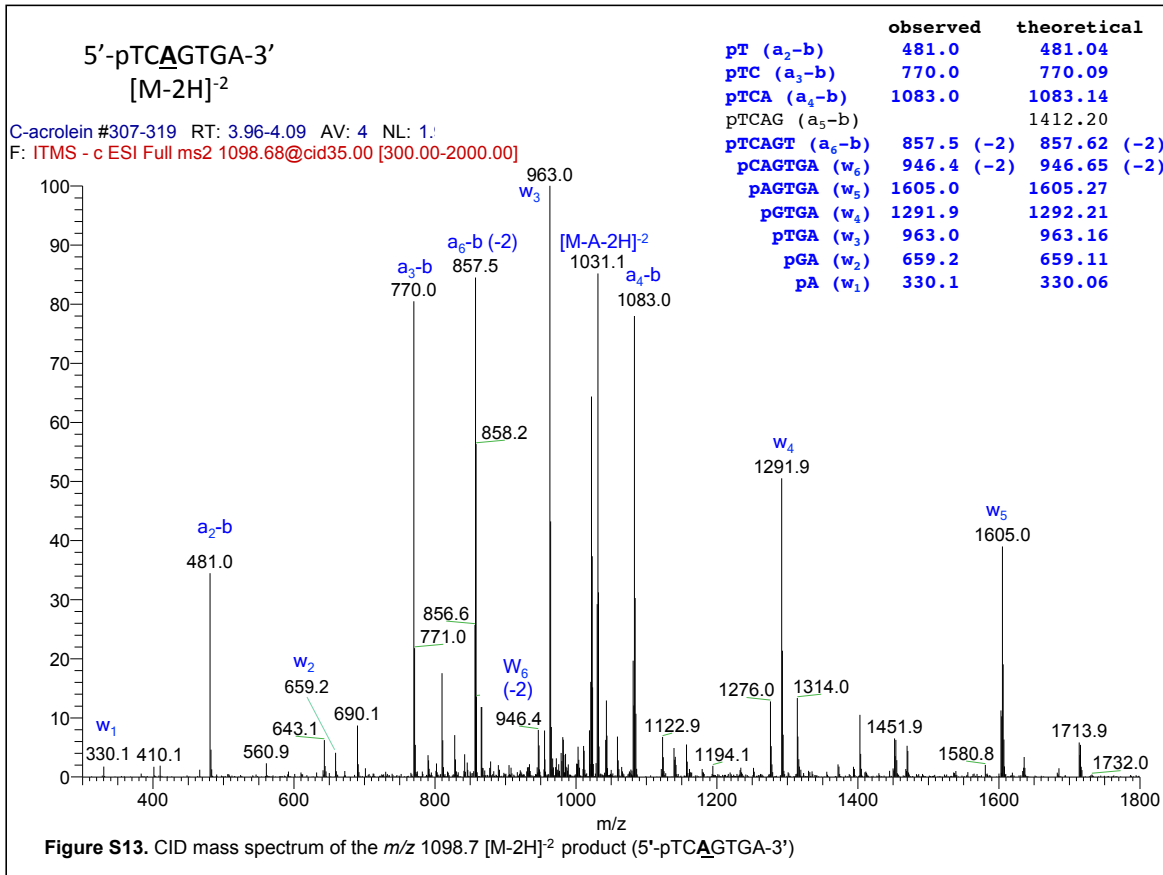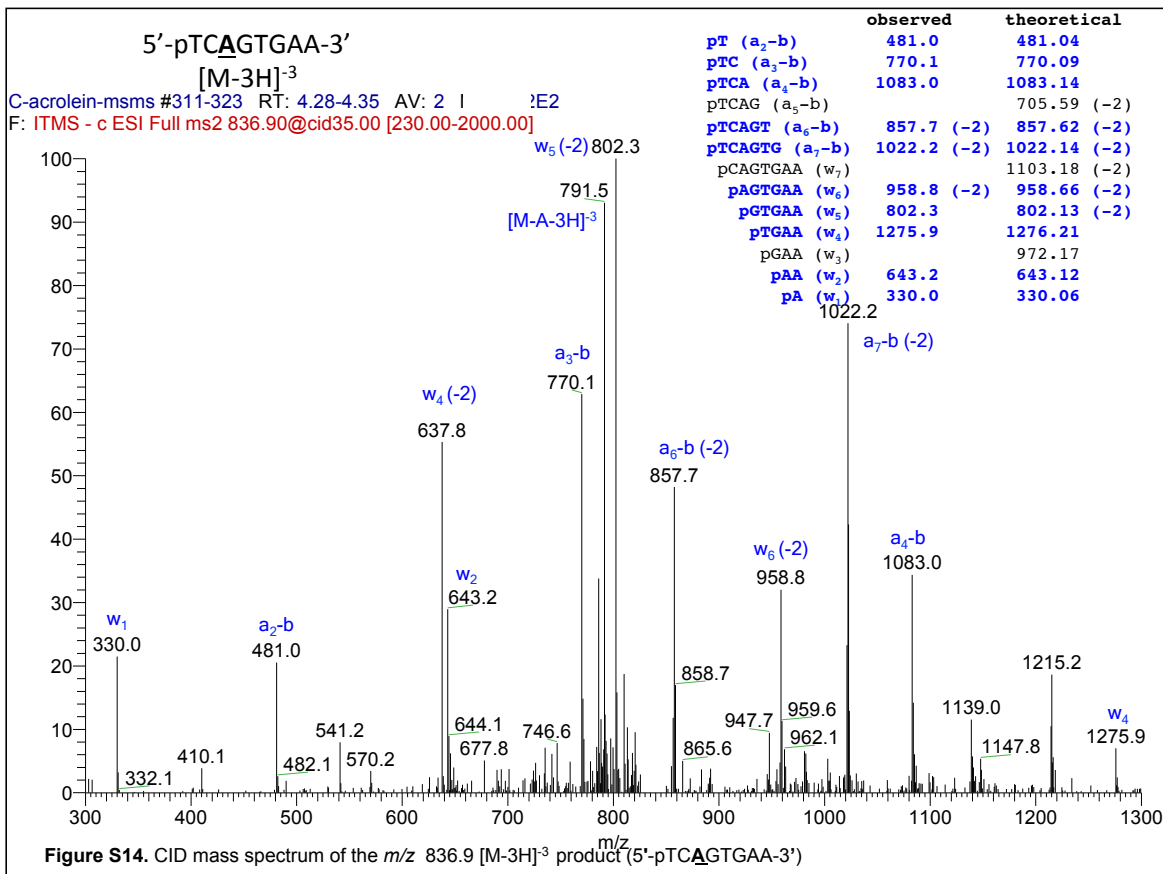

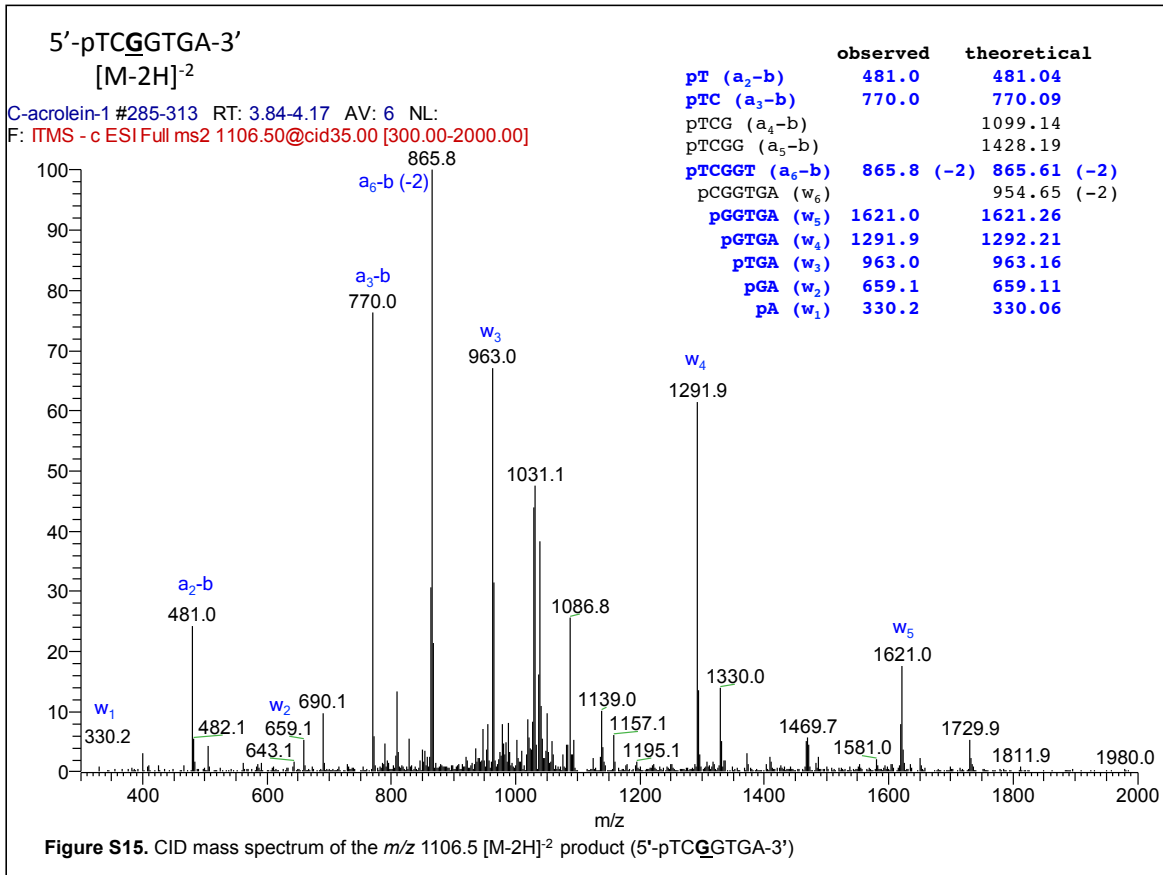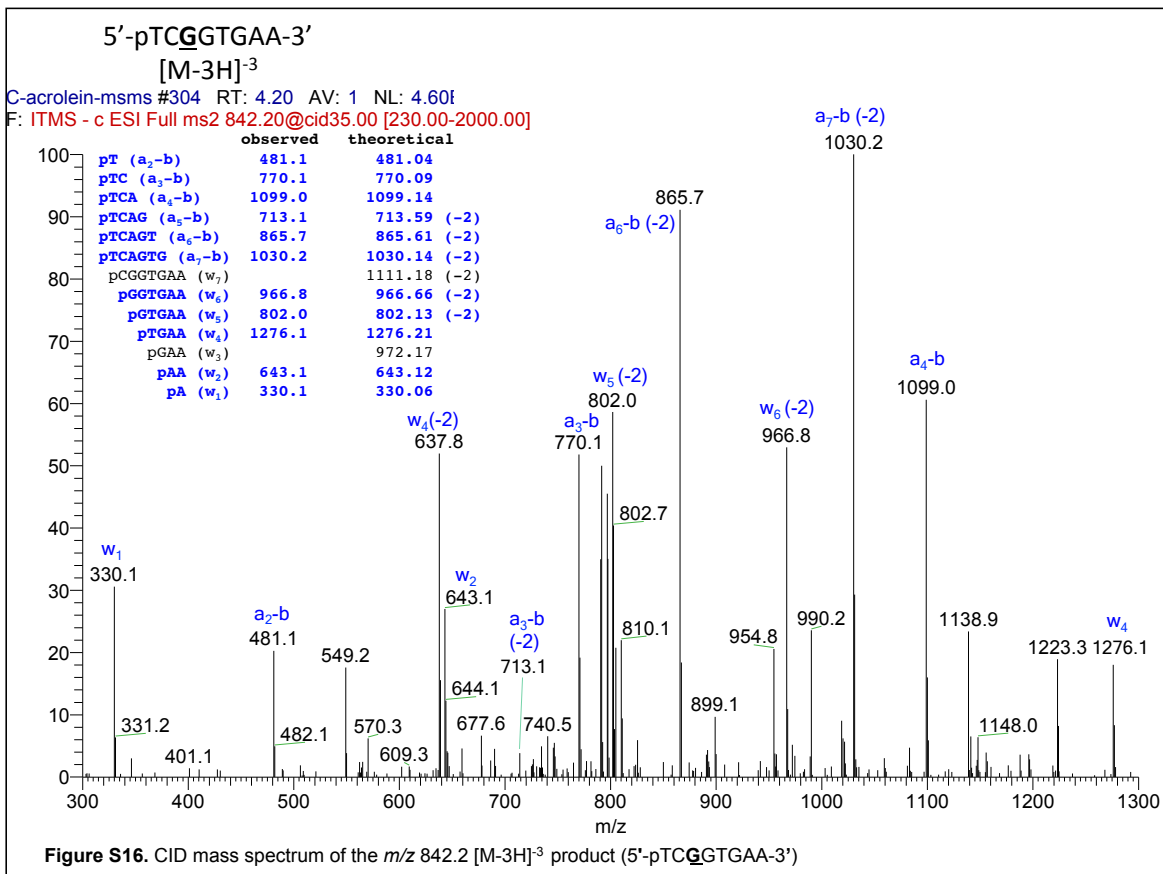

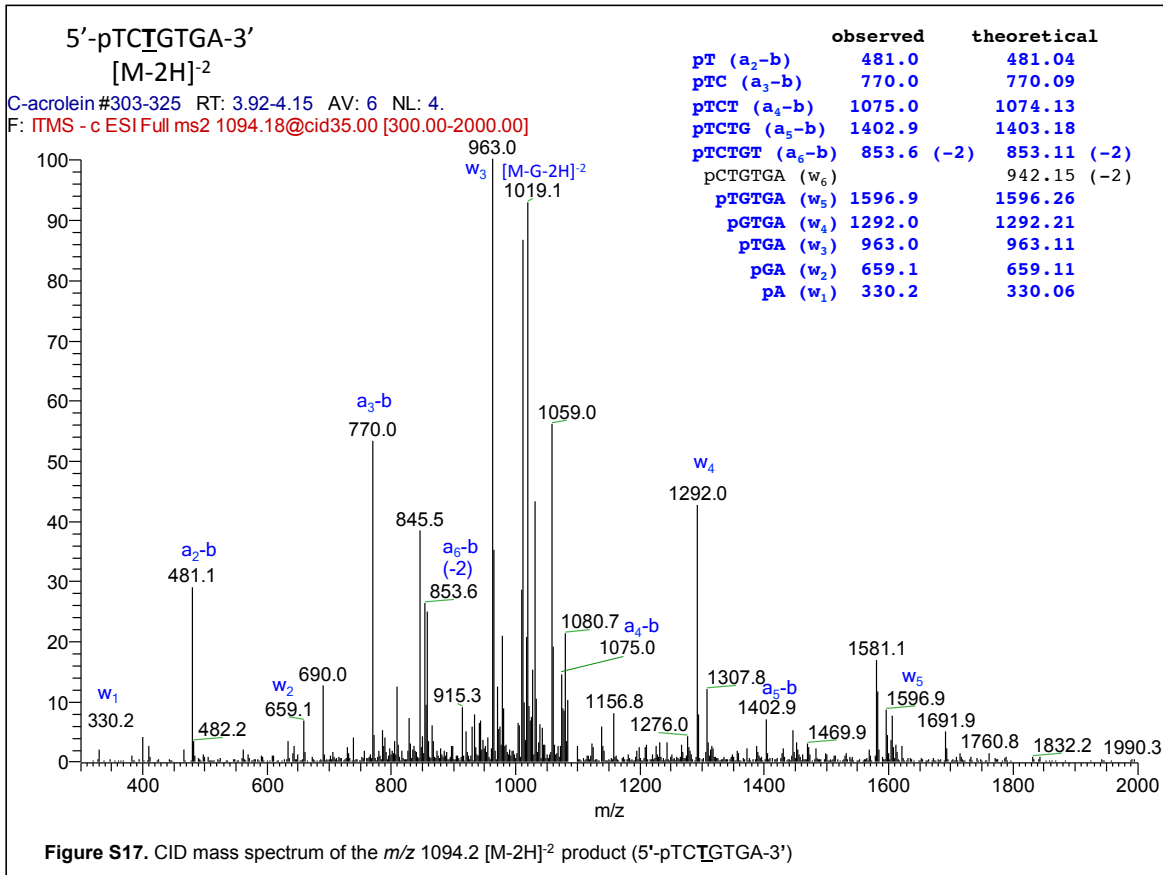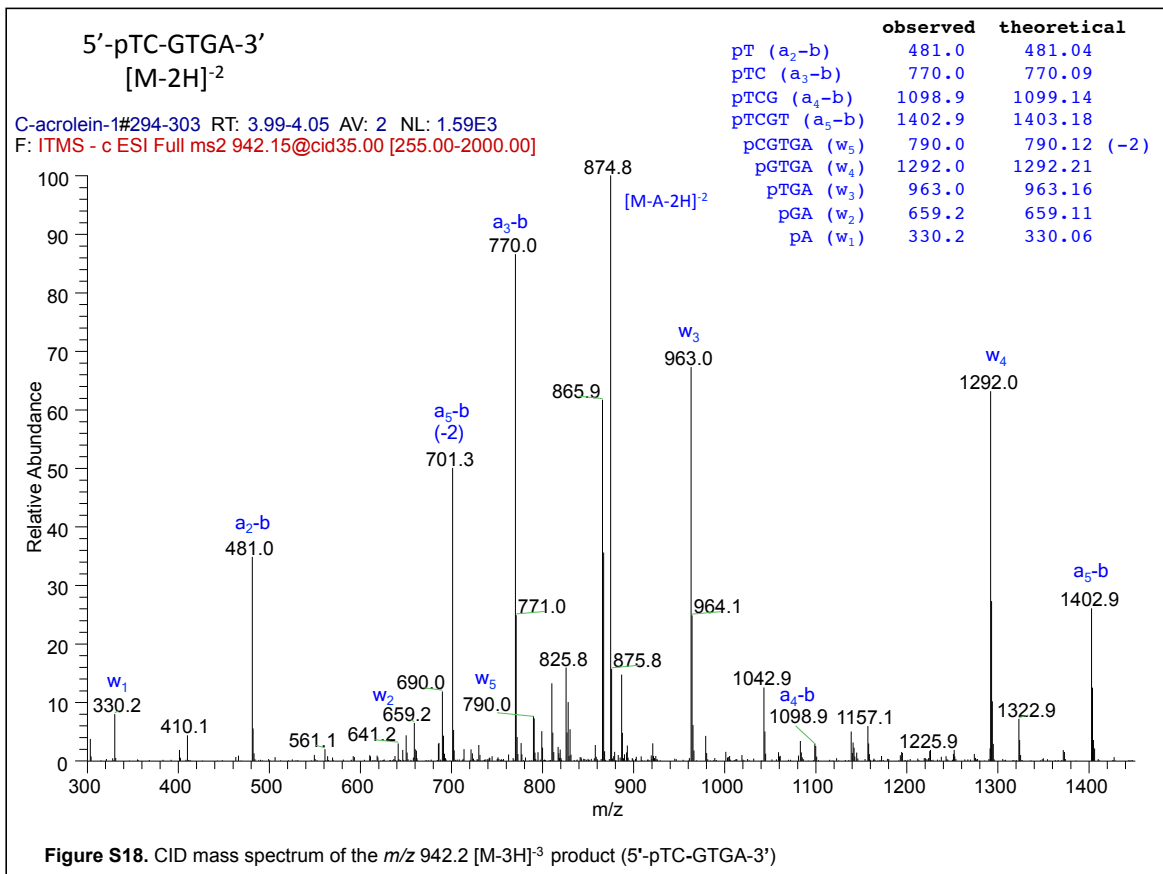

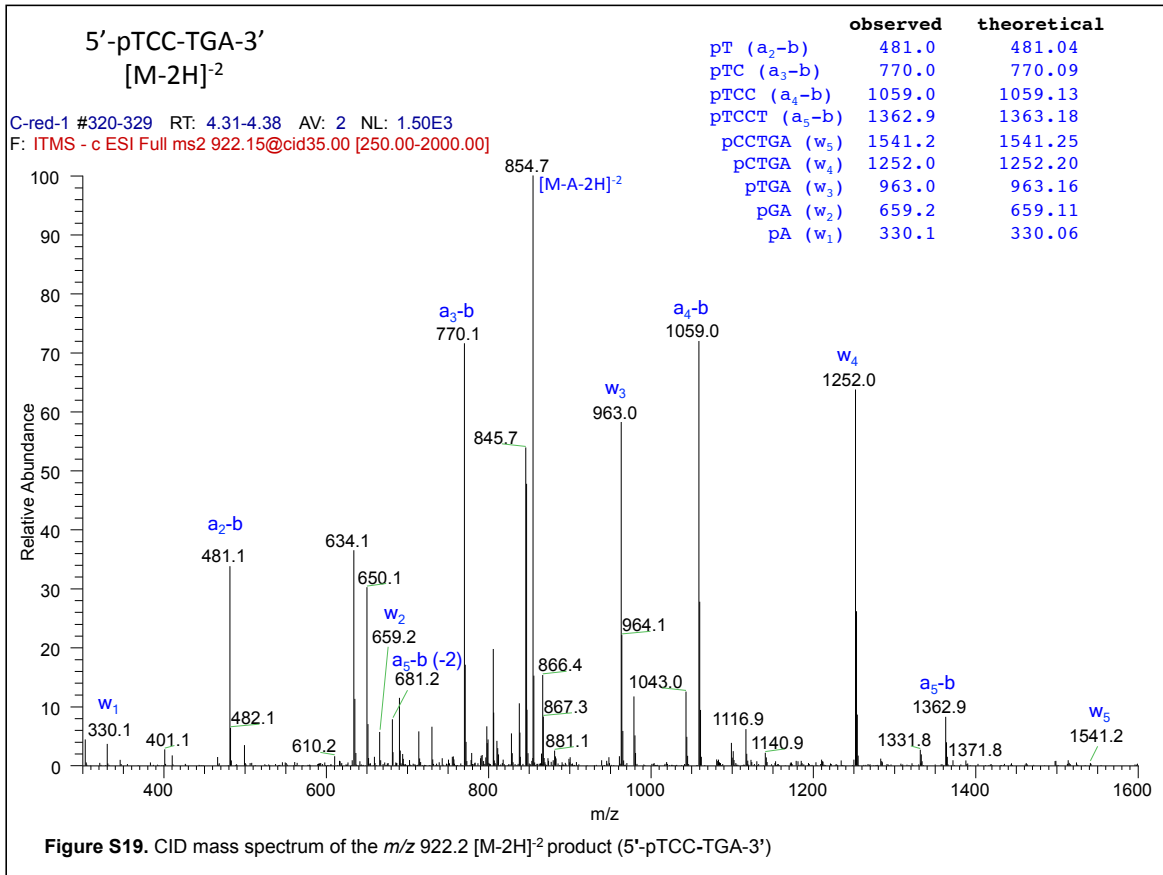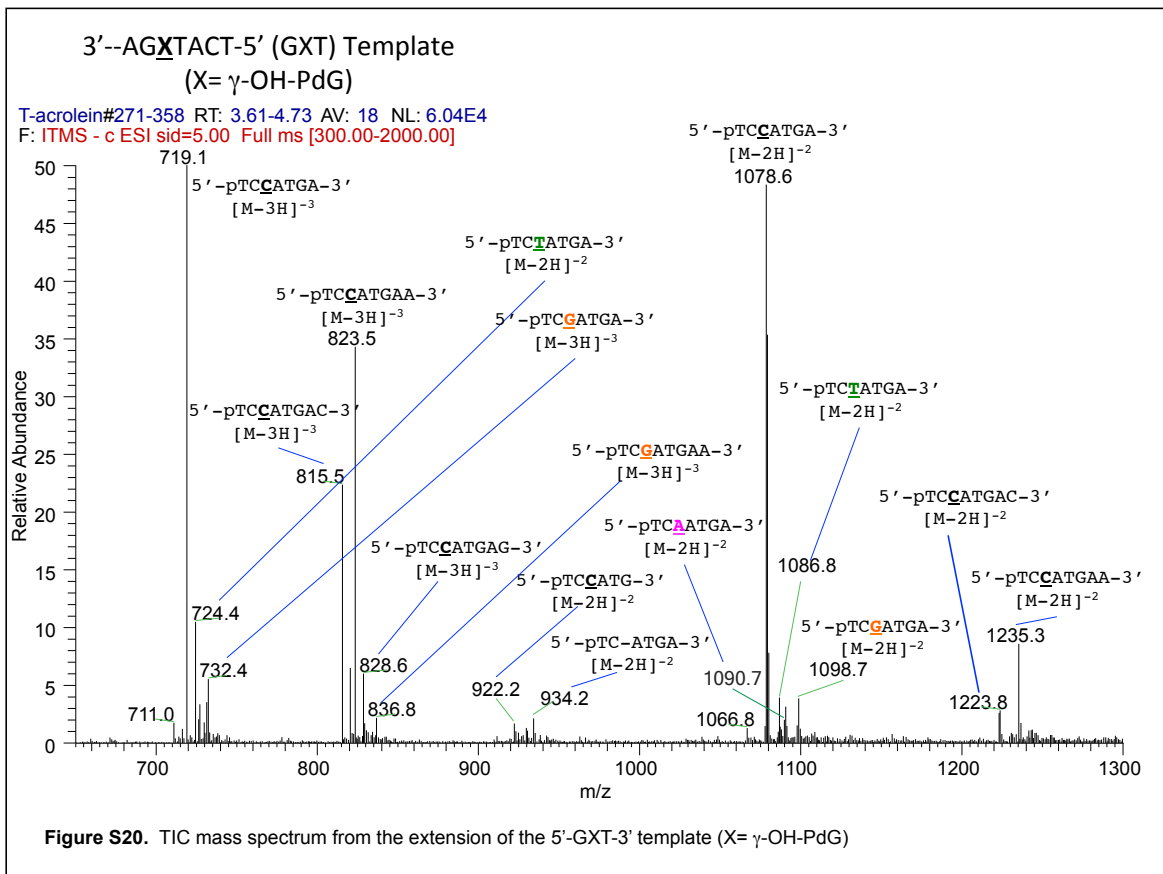

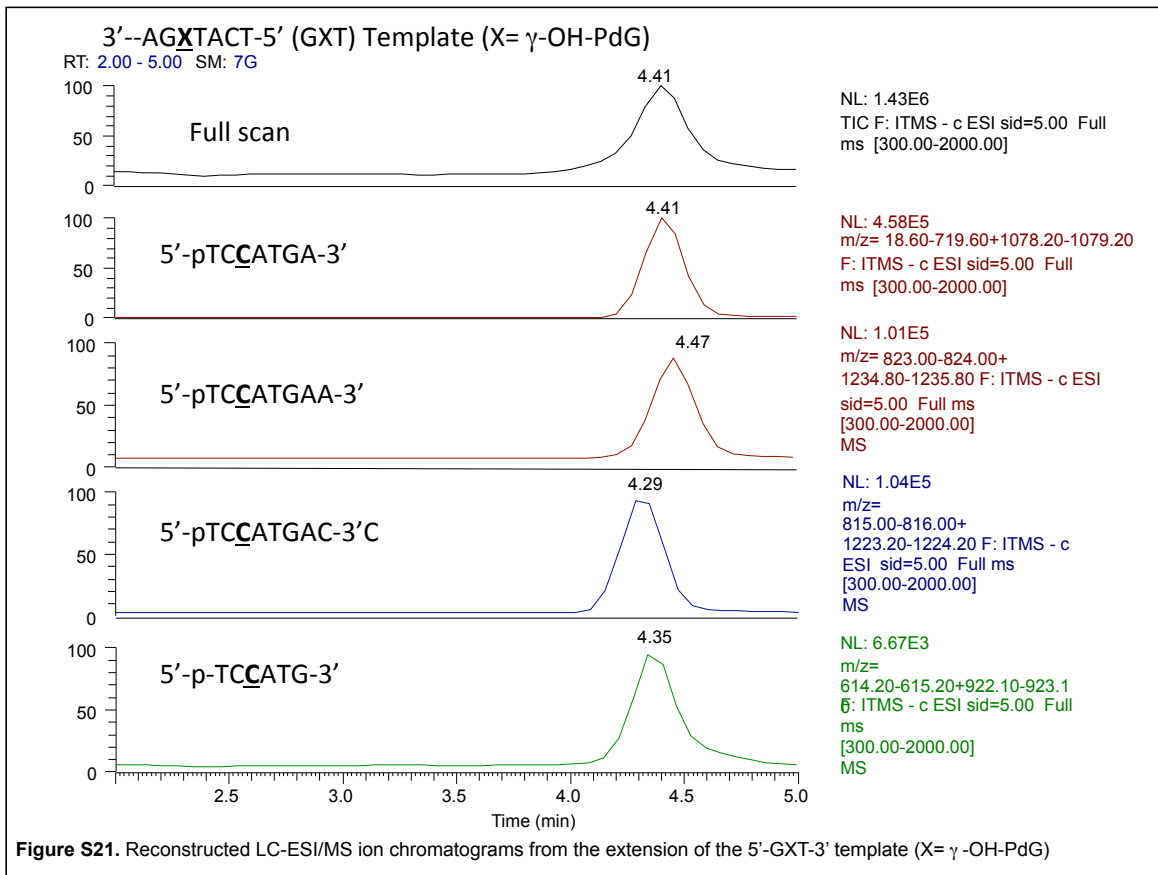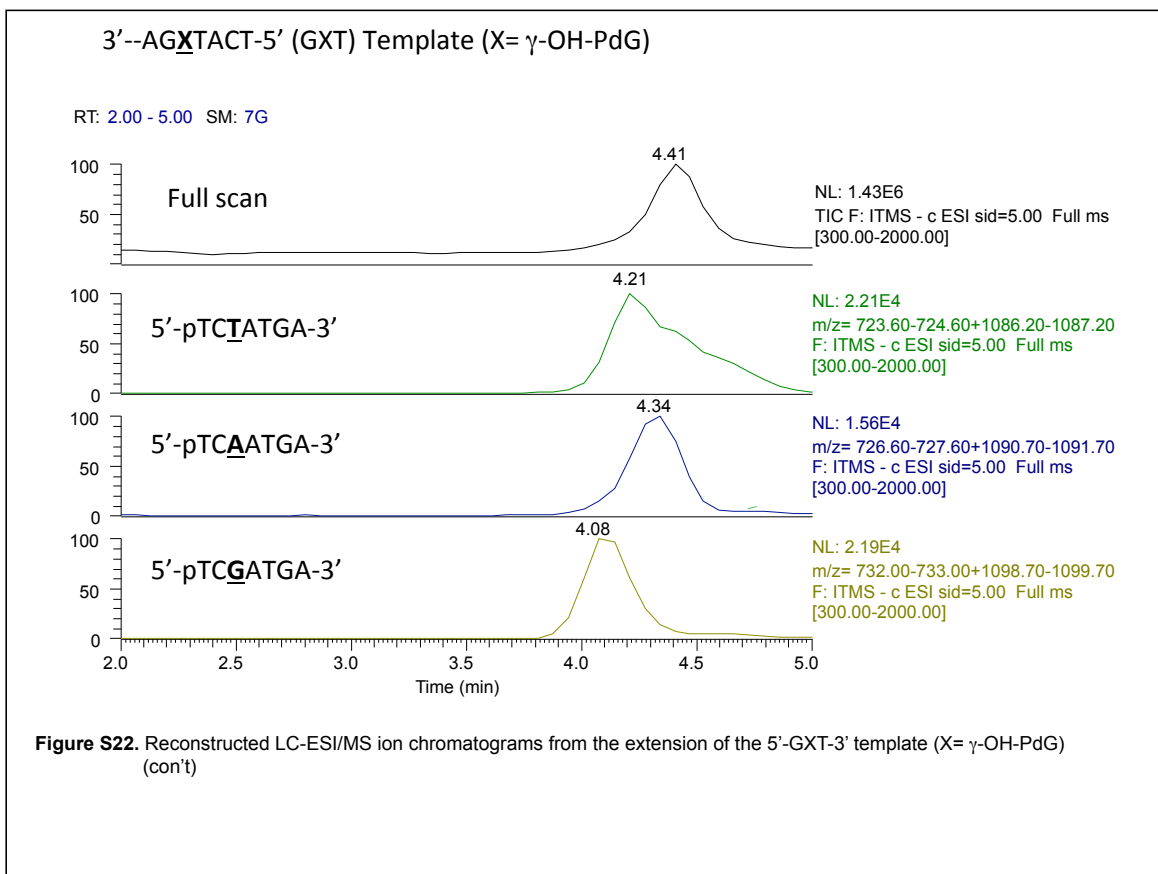

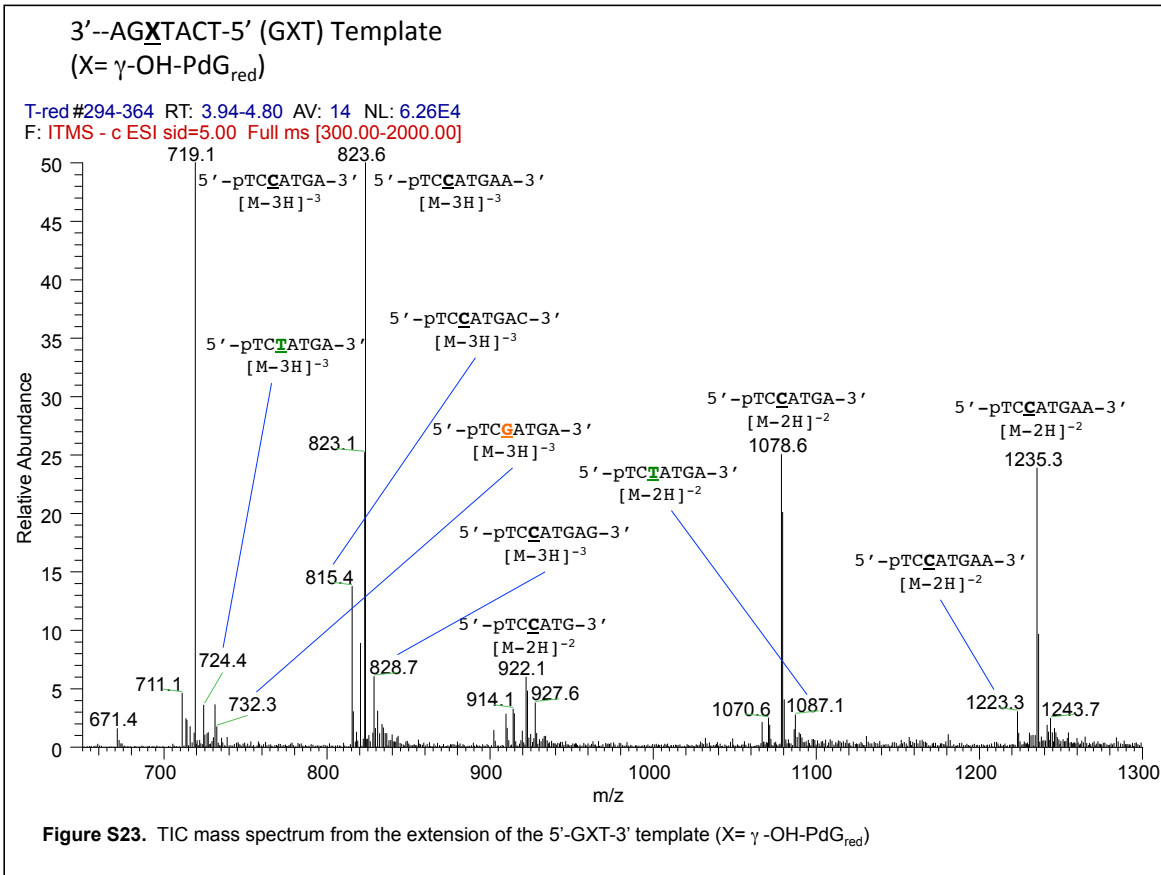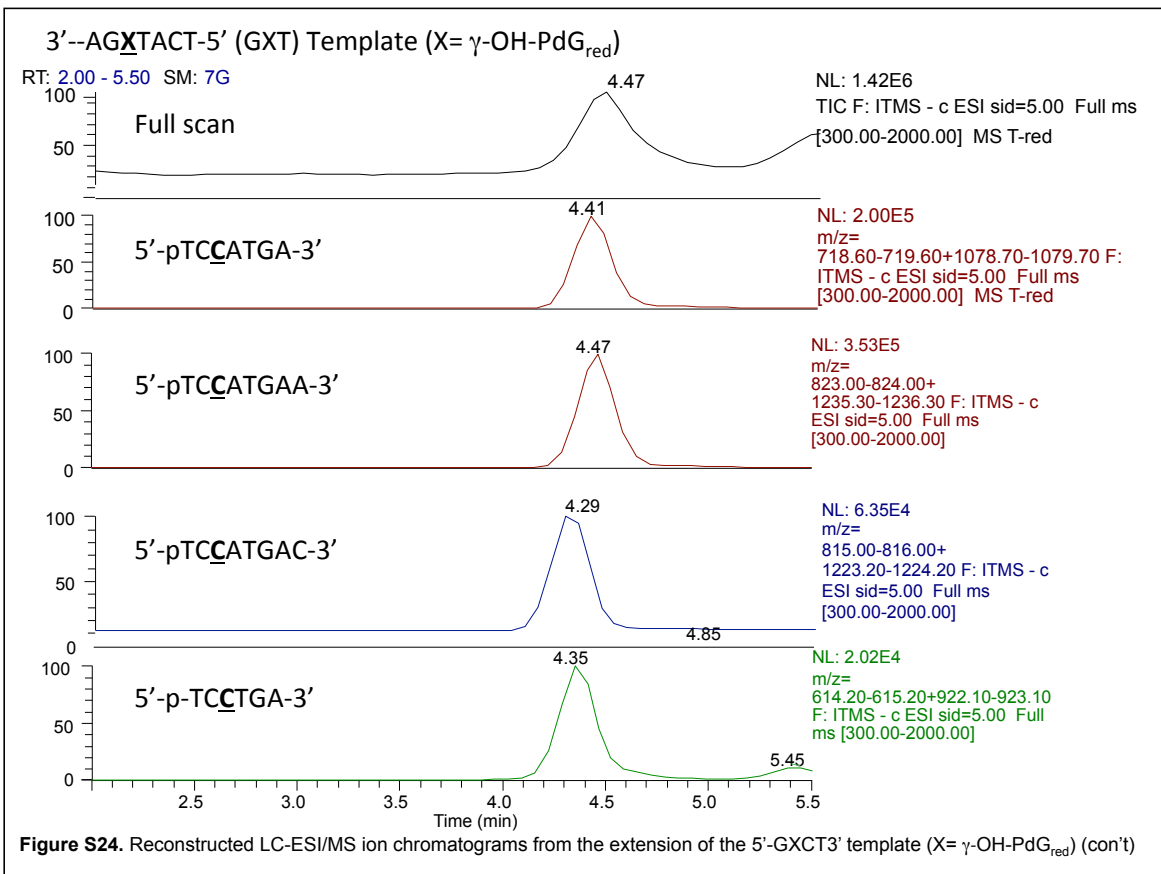

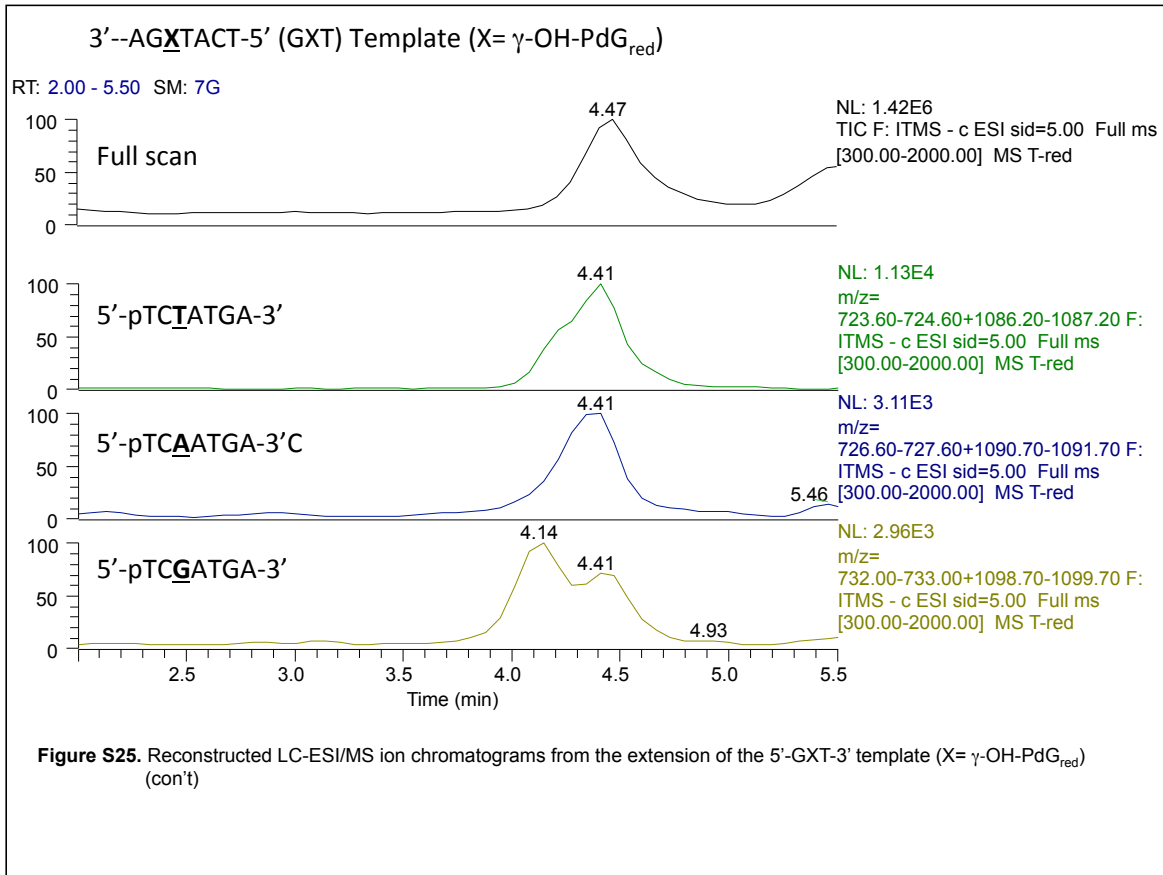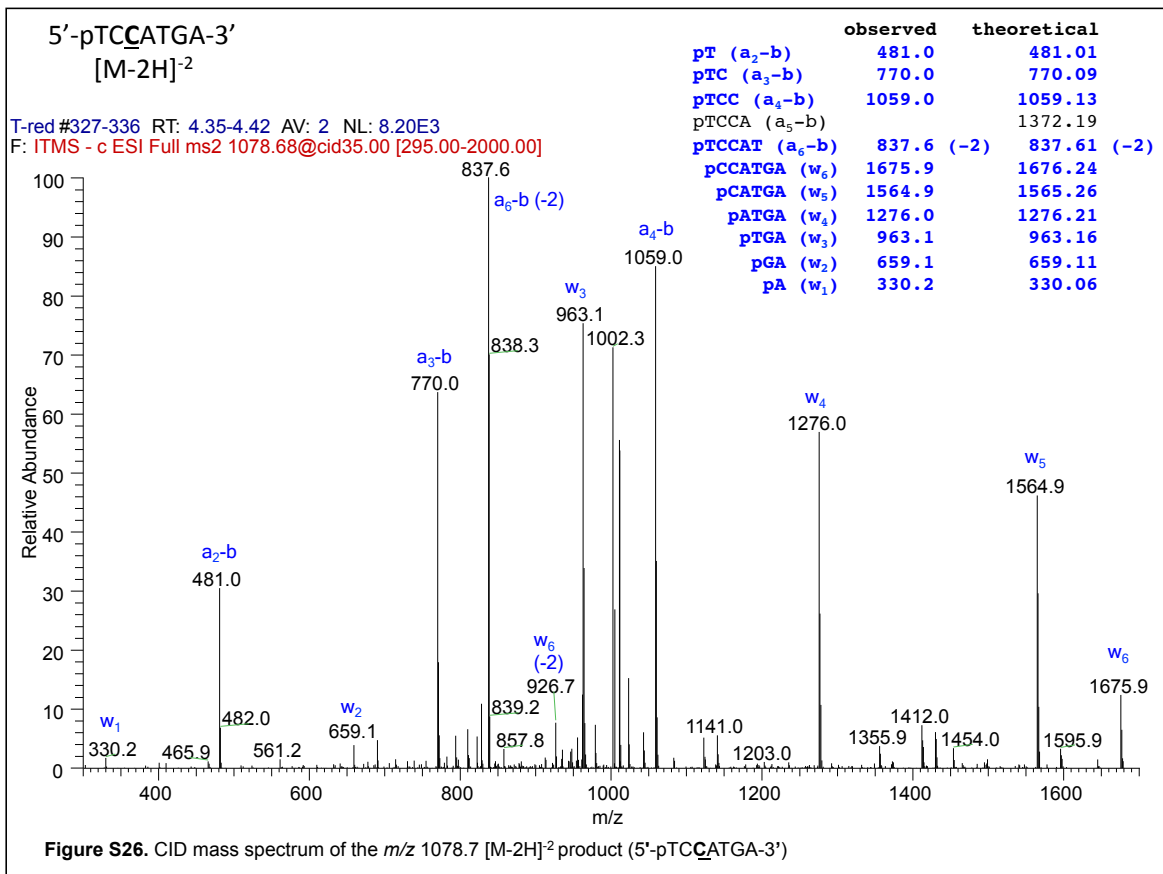

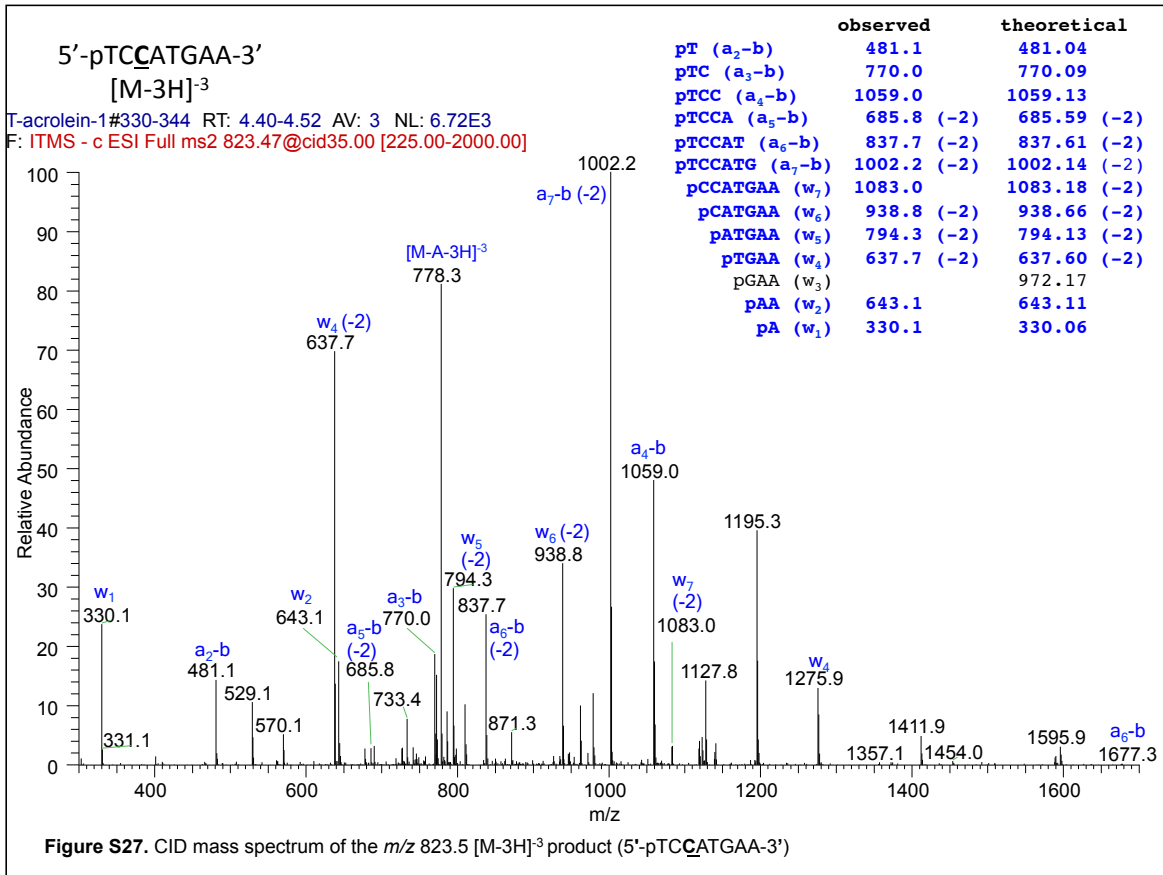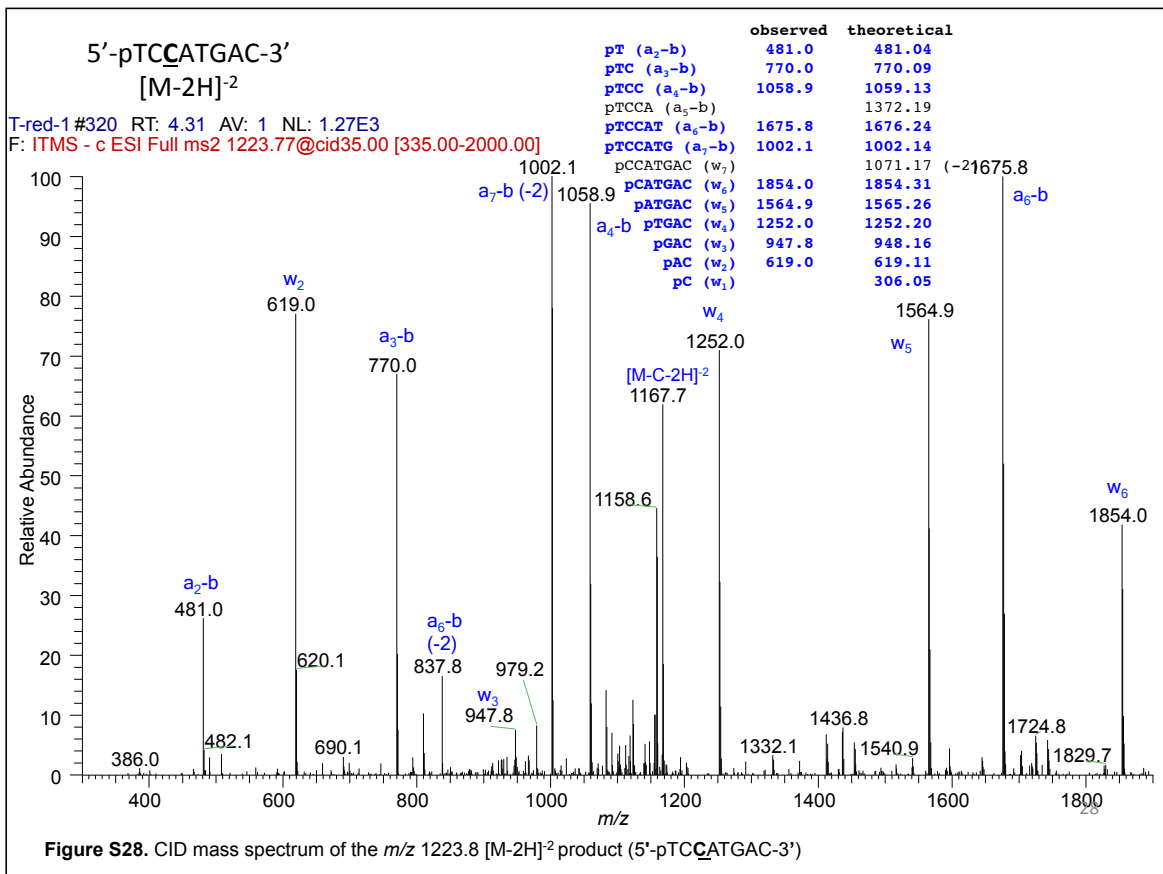



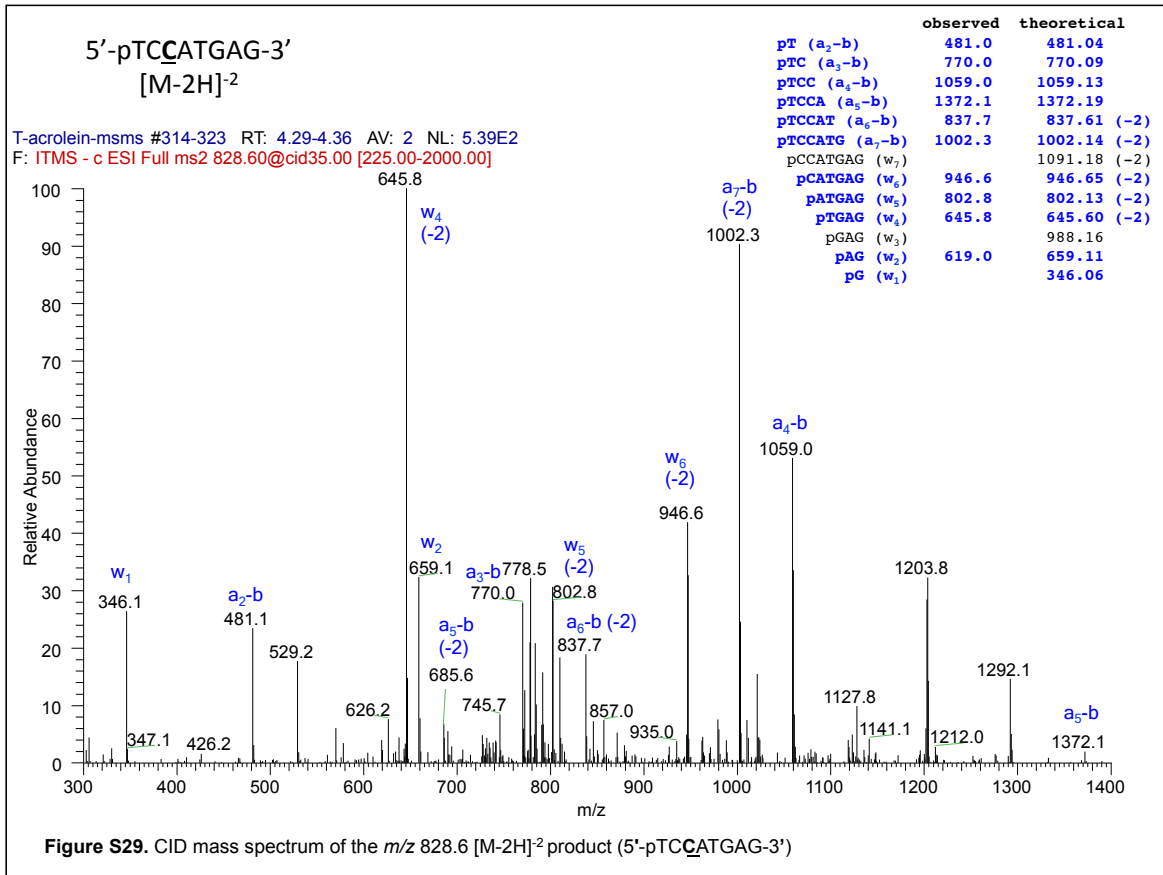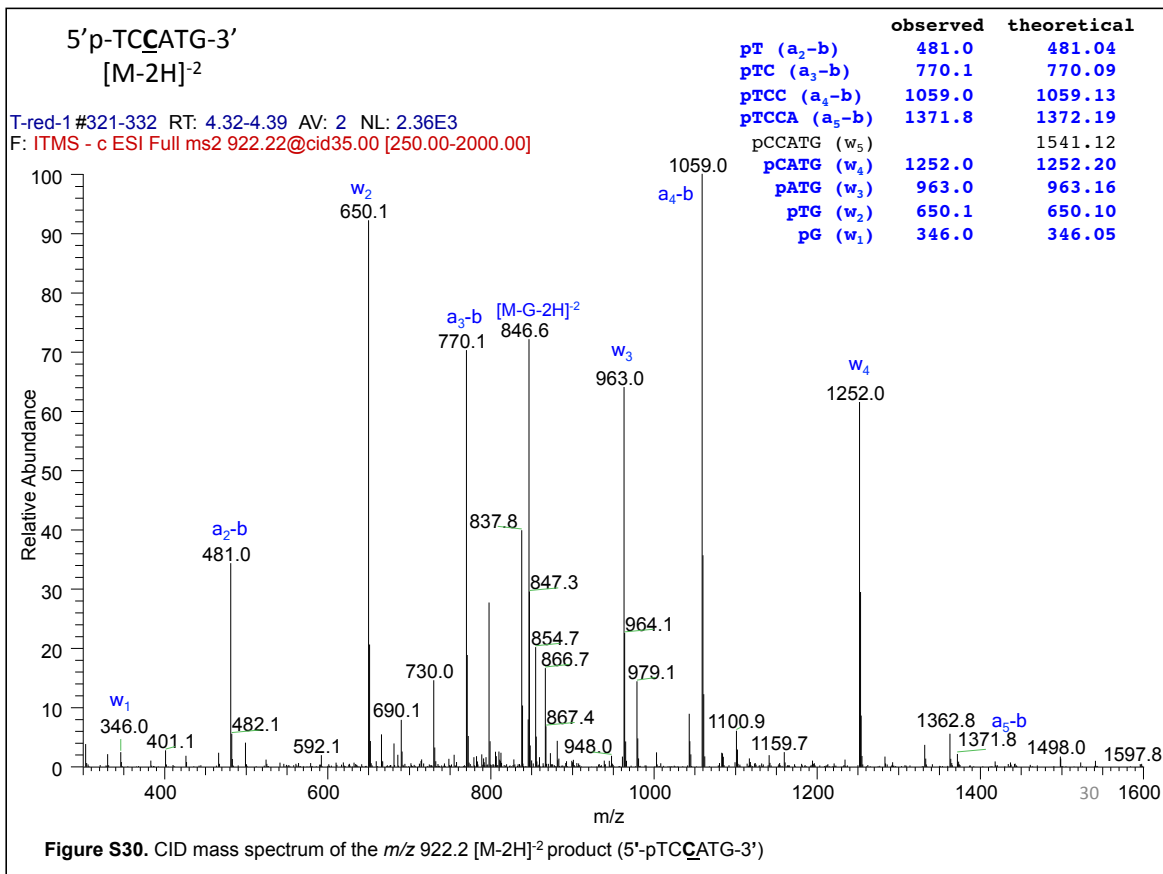

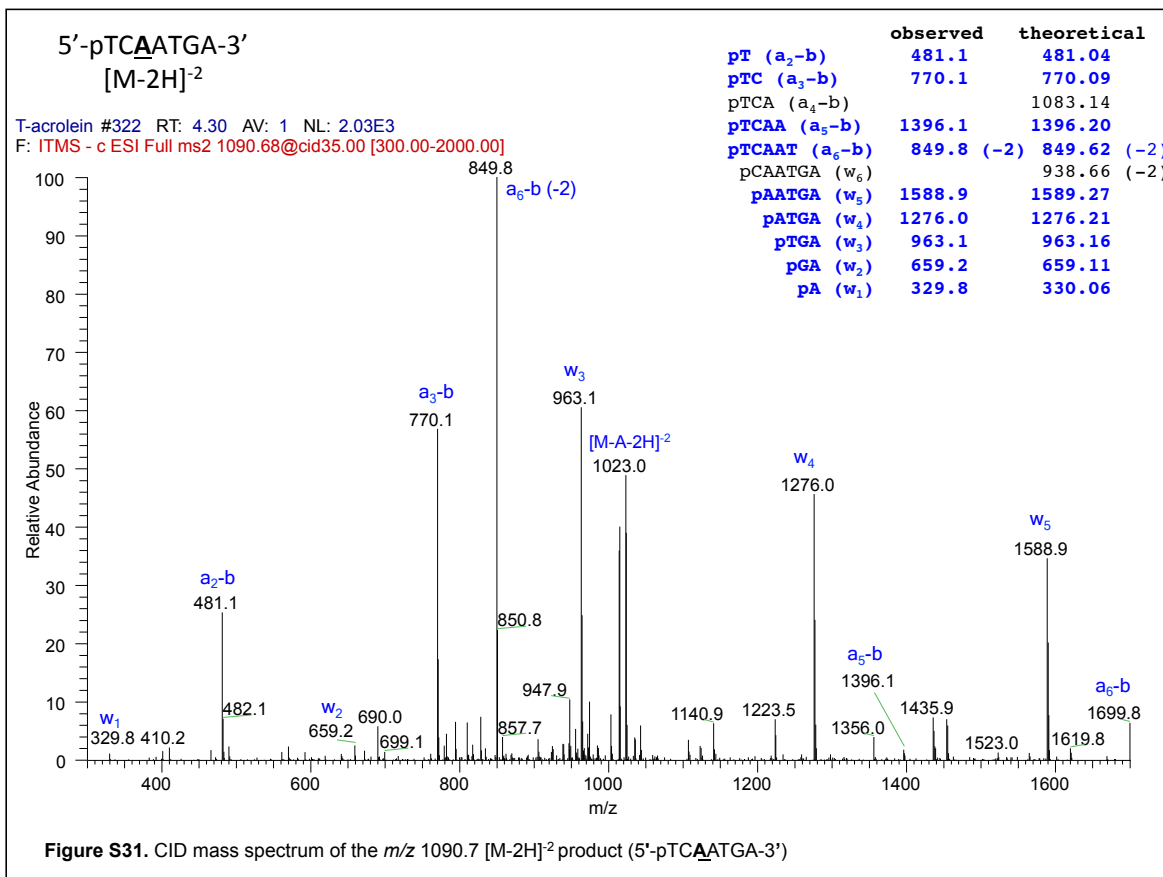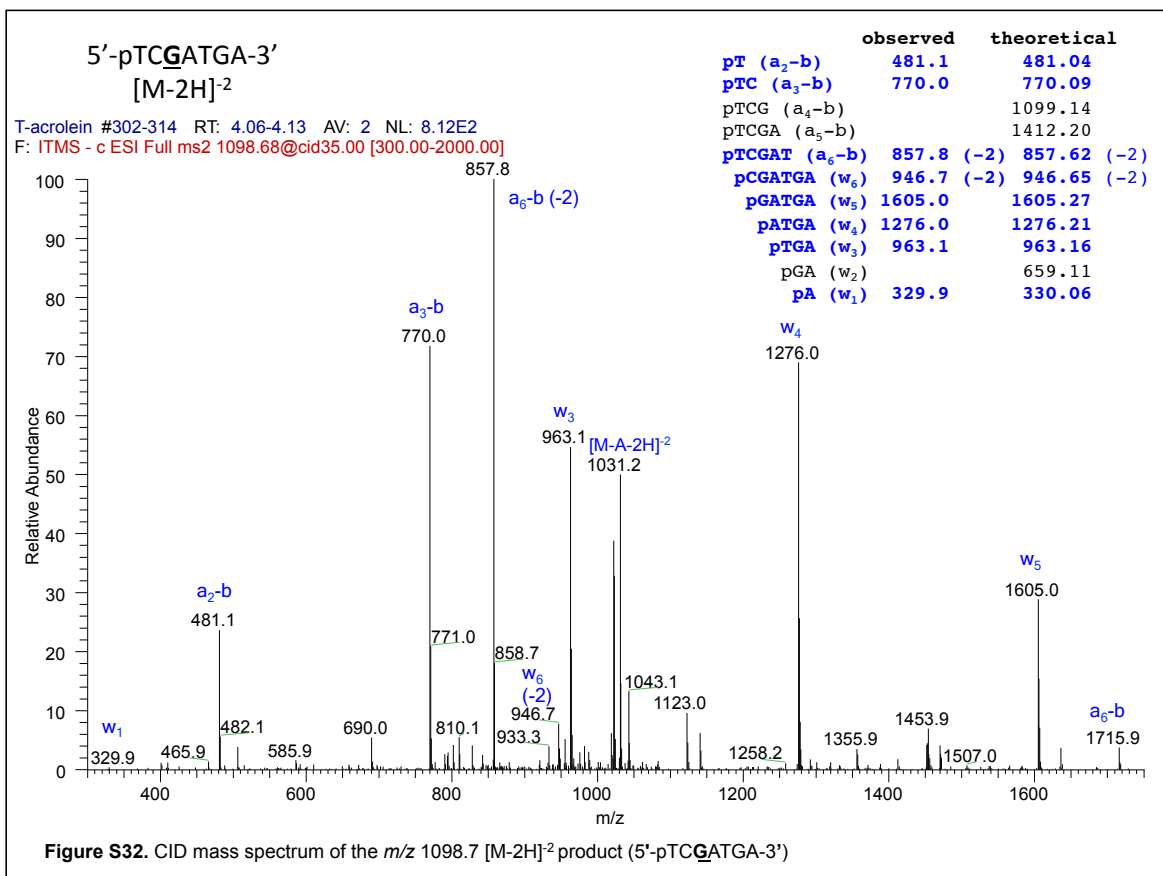

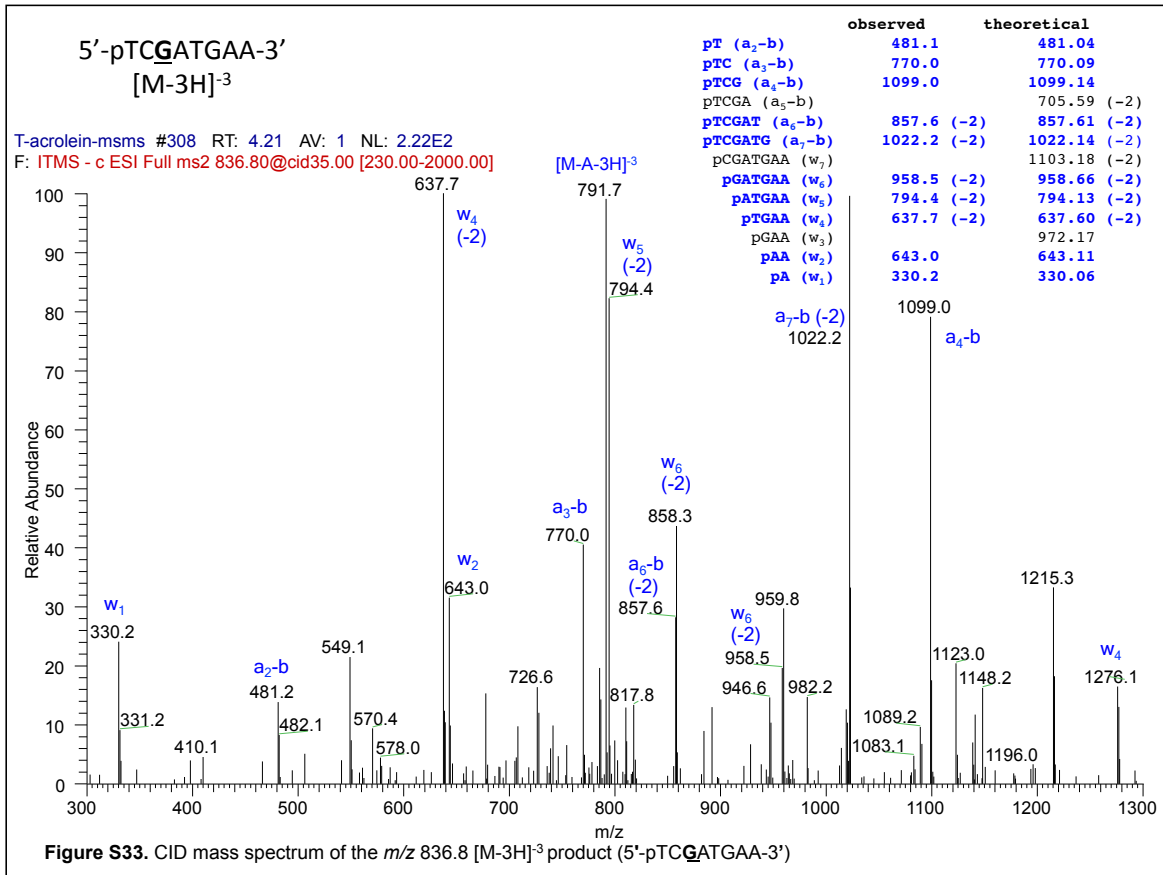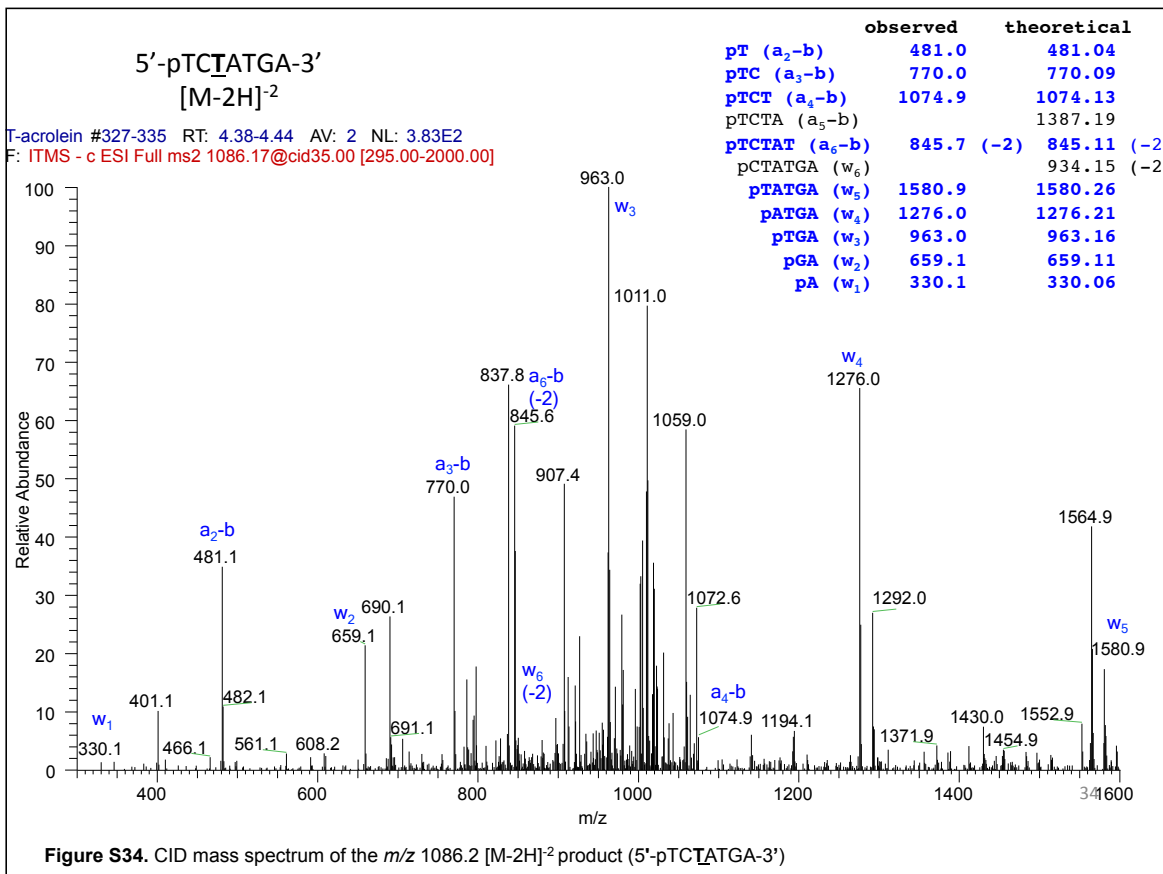

Supplement: tx400200b_si_001.pdf [file tx400200b_si_001.pdf]
